# Supplementary material for: Impact of a reduced red and processed meat dietary pattern on disease risks and greenhouse gas emissions in the UK: a modelling study
Source: PubMed Central journal article supplement — BMJ Open. 2012 Sep 10;2(5):e001072. doi: 10.1136/bmjopen-2012-001072 (PMC3467613; doi:10.1136/bmjopen-2012-001072), 2012-09-10
Supplement: bmjopen-2012-001072.draft_revisions.pdf [file bmjopen-2012-001072.draft_revisions.pdf]

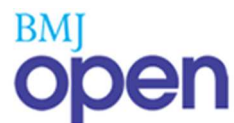

**Impact of a reduced red and processed meat dietary pattern on disease risks and greenhouse gas emissions in the UK: A modelling study**

|                                 |                                                                                                                                                                                                              |
|---------------------------------|--------------------------------------------------------------------------------------------------------------------------------------------------------------------------------------------------------------|
| Journal:                        | <i>BMJ Open</i>                                                                                                                                                                                              |
| Manuscript ID:                  | bmjopen-2012-001072                                                                                                                                                                                          |
| Article Type:                   | Research                                                                                                                                                                                                     |
| Date Submitted by the Author:   | 29-Mar-2012                                                                                                                                                                                                  |
| Complete List of Authors:       | Aston, Louise; University of Cambridge, Institute of Public Health<br>Smith, James; University of Cambridge, Institute of Public Health<br>Powles, John; University of Cambridge, Institute of Public Health |
| <b>Primary Subject Heading</b>: | Public health                                                                                                                                                                                                |
| Secondary Subject Heading:      | Nutrition and metabolism, Cardiovascular medicine, Oncology                                                                                                                                                  |
| Keywords:                       | Meat intake, Climate, Diabetes risk, Coronary heart disease risk, Colorectal cancer risk                                                                                                                     |
|                                 |                                                                                                                                                                                                              |

SCHOLARONE™  
Manuscripts

1 Impact of a reduced red and processed meat dietary pattern on disease risks and greenhouse  
2 gas emissions in the UK: A modelling study  
3  
4

5  
6 Louise M Aston, James N Smith, John W Powles  
7

8  
9 Institute of Public Health, University of Cambridge, Forvie Site, Robinson Way, Cambridge,  
10 CB2 0SR, UK  
11

12 Louise M Aston

13 Specialty Registrar in Public Health

14 James N Smith

15 Specialty Registrar in Public Health

16 John W Powles

17 Senior Lecturer in Public Health Medicine  
18  
19  
20  
21

22 Correspondence to: [louise.aston@cantab.net](mailto:louise.aston@cantab.net)  
23  
24  
25  
26  
27  
28

29 Author contributions: All authors contributed to conception and design of the study. Data  
30 analysis and interpretation was performed by LMA and JWP. All authors contributed to  
31 manuscript preparation and have approved the submitted manuscript.  
32  
33  
34  
35  
36

37 Copyright: The Corresponding Author has the right to grant on behalf of all authors and does  
38 grant on behalf of all authors, a worldwide licence to the Publishers and its licensees in  
39 perpetuity, in all forms, formats and media (whether known now or created in the future), to i)  
40 publish, reproduce, distribute, display and store the Contribution, ii) translate the Contribution  
41 into other languages, create adaptations, reprints, include within collections and create  
42 summaries, extracts and/or, abstracts of the Contribution, iii) create any other derivative  
43 work(s) based on the Contribution, iv) to exploit all subsidiary rights in the Contribution, v)  
44 the inclusion of electronic links from the Contribution to third party material where-ever it  
45 may be located; and, vi) licence any third party to do any or all of the above.  
46  
47  
48  
49  
50  
51  
52  
53

54 Funding and acknowledgements: Work contributing to this manuscript was carried out as part  
55 of the University of Cambridge MPhil in Public Health degree (LMA and JNS, supervised by  
56 JWP); degrees were funded by the NHS East of England Multi-professional Deanery. There  
57 are no conflicts of interest to declare.  
58  
59  
60

## Article Summary

### Article focus

- Consumption of red and processed meat is a leading contributor to greenhouse gas emissions
- High intakes of red and processed meats increase the risks of several leading chronic diseases
- This research identifies a low red and processed meat dietary pattern that is already followed by a substantial fraction of the UK population and estimates health and environmental benefits that would result from its general adoption

### Key messages

- Habitual red and processed meat intakes are 2.5 times higher in the top compared with the bottom fifth of UK consumers
- Sustained dietary intakes at a counterfactual reduced level in the UK population would materially reduce incidence of coronary heart disease, diabetes mellitus and colorectal cancer, by 3-12%
- The predicted reduction in UK food and drink associated greenhouse gas emissions would equate to almost 28 million tonnes per year across the population

### Strengths and limitations of the study

- This research uses a food-based approach, taking intake-risk associations from meta-analyses rather than assuming the mechanisms via which the foods influence disease risk
- The dietary data was collected a decade ago, however the headline results from a more recent national dietary survey reveal that intakes of all meat categories were broadly similar although slightly higher in 2008/9 than in 2000/1

## Abstract

**Objectives** Consumption of red and processed meat (RPM) is a leading contributor to greenhouse gas (GHG) emissions and high intakes of these foods increase the risks of several leading chronic diseases. The aim was to use newly-derived estimates of habitual meat intakes in UK adults to assess potential co-benefits to health and the climate from reduced RPM consumption.

**Design** Modelling study using dietary intake data from the National Diet and Nutrition Survey of British Adults.

**Setting** British general population

**Methods** Respondents were divided into fifths by energy-adjusted RPM intakes, with vegetarians constituting a sixth stratum. GHG emitted in supplying the diets of each stratum were estimated using data from life cycle analyses. A feasible counterfactual UK population was specified, in which the proportion of vegetarians measured in the survey population doubled, and the remainder adopted the dietary pattern of the lowest fifth of RPM consumers.

**Outcome measures** Reductions in disease risks and GHG emissions under the counterfactual.

**Results** Habitual RPM intakes were 2.5 times higher in the top compared with the bottom fifth of consumers. Risks of coronary heart disease, diabetes and colorectal cancer were associated with processed meat intakes and colorectal cancer was also associated with intakes of unprocessed red meat. Under the counterfactual, reductions in population aggregate risks ranged from 3.2% (95% CI 1.9, 4.7) for diabetes in females to 12.1% (6.4, 17.8) for colorectal cancer in males, with those moving from the highest to low consumption levels gaining about twice these averages. The expected reduction in GHG emissions was 0.45 tonnes CO<sub>2</sub>-e/person/year, about 3% of the current total, giving a reduction across the UK population of 27.8 million tonnes/year.

**Conclusions** Reduced consumption of RPM would bring multiple benefits to health and the environment. Current high consumers would gain most, illustrating the potential to reduce health inequalities.

## Introduction

Climate change is ‘the biggest global health threat of the 21<sup>st</sup> century’<sup>1</sup> and appropriately chosen mitigation policies could ‘bring significant immediate co-benefits for population health and well-being’.<sup>2</sup> Health benefits provide near-term rewards for climate-friendly changes, whereas the benefits accruing as climate change mitigation apply to anonymous populations distant in time. Health co-benefits may thus ‘nudge’ humanity towards a sustainable future.

Food and drink account for around one-third of total greenhouse gas (GHG) emissions attributable to UK consumers (when contributions from land use changes for agriculture are included). Around half of these emissions are ‘embedded’ in imports.<sup>3</sup> Livestock products are particularly GHG intensive, with the Food and Agriculture Organization attributing 18% of total global GHG emissions to these (when contributions from land use and land use change are included).<sup>4</sup> Although emissions can be reduced by changing production methods, savings will not be sufficient to offset the effects of rising global demand, and radical departures from ‘business as usual’ trajectories will be needed to prevent global GHG emissions from livestock production rising unsustainably.<sup>5,6</sup> Even when food imports to the UK are ignored, failure to reduce domestic agricultural emissions will risk making the government’s 2050 target for an 80% reduction in total UK-based GHG emissions ‘unattainable’.<sup>7</sup> Considering only the final product, the UK has approximately 50 to 90% self-sufficiency in production of different livestock (see web appendix). However the distribution of GHG emissions between the UK and overseas differs substantially from these figures due to major imports of cereals and soy for animal feed.

Here we estimate co-benefits to health and climate change mitigation if, in the UK, high consumers of red and processed meat were to adopt the diets of low consumers. We predict reduced incidence of coronary heart disease, diabetes mellitus and colorectal cancer.<sup>8-10</sup> Together, these diseases accounted for almost 12% of the total disease burden in the UK in 2004.<sup>11</sup>

## Methods

### *Dietary measurements*

Meat intakes have been estimated from the 2000/1 British National Diet and Nutrition Survey (NDNS), which collected 7 days of weighed dietary records from a sample of 1,724 respondents aged 19-64y.<sup>12</sup> As previous reports from this source had not separately identified the meat content of composite meat-containing dishes, we derived new estimates by

1 systematically recoding the original records.<sup>13</sup> Meats were classified as (unprocessed) red,  
2 processed or white, and all foods were allocated to 1 of 45 food categories, designed to be  
3 relatively homogeneous in both their nutritional characteristics and in the GHG emissions  
4 arising from their supply (Table 1, which also includes the operational definitions of red,  
5 white and processed meat).  
6  
7  
8  
9

10 Intakes of each type of meat were adjusted for total energy intake (g/MJ). The NDNS sample  
11 was then split by sex, and stratified on the basis of average daily intakes of red plus processed  
12 meat (RPM). Self-declared vegetarians (2% of males, 7% of females) were allocated to their  
13 own stratum.<sup>14</sup> Remaining respondents were then ranked by average daily RPM intake and  
14 divided into fifths (F1 being lowest consumers, F5 highest). Mean RPM intakes for each of  
15 the resulting 6 sex-specific strata were standardised to the sex-specific mean energy intake in  
16 the total sample. To correct for classifying individuals on intakes recorded over just 7 days,  
17 habitual intakes were estimated for strata F1 to F5 using ratios of between-person to total  
18 variance in daily intakes. Mean energy-standardised intakes of all 45 food categories were  
19 then calculated for each stratum. Stratum F1 was taken to exemplify a 'climate-friendly' low  
20 RPM dietary pattern. Key food and nutrient intakes plus health, behavioural and socio-  
21 demographic variables across these strata are described elsewhere.<sup>13</sup>  
22  
23  
24  
25  
26  
27  
28  
29

### 30 *Assignment of greenhouse gas emissions to food categories*

31 Emissions (given in table 1) are expressed as kg of CO<sub>2</sub>-equivalent (CO<sub>2</sub>-e) GHG resulting  
32 from all steps involved in making a given weight of food available for human consumption.  
33 Published values determined by life cycle analyses were identified and used to estimate  
34 average emissions for each of the 45 food categories.<sup>15,16</sup> Because emissions vary with system  
35 and country of production, weighted averages were calculated for meats according to  
36 proportions imported or produced in the UK under various systems. In the absence of data,  
37 processed meats were ascribed the values of equivalent unprocessed meats. Values for similar  
38 foods were interpolated where data was lacking. For the residual 'miscellaneous' category,  
39 the mean of all non-meat, non-beverage categories was applied. (Further details in Web  
40 Appendix: Assumptions and methods used to estimate greenhouse gas emissions from  
41 producing foods for UK consumers.)  
42  
43  
44  
45  
46  
47  
48  
49  
50

### 51 *Specification of a counterfactual diet*

52 A 'feasible alternative'<sup>17</sup> counterfactual distribution of diets was specified as one in which the  
53 proportions of vegetarians in each sex doubled and the remainder of the population adopted  
54 the average dietary pattern of F1. All else was assumed to remain equal. Calculations were  
55  
56  
57  
58  
59  
60

based on data for persons aged 19-64y. Estimates for Britain in 2000/1 were assumed to be generalizable to the UK over the following decade to the present day.

#### *Changes in meat-related disease risks with the counterfactual intakes*

Risk relationships for red and processed meat intakes and coronary heart disease (CHD), diabetes mellitus and colorectal cancer were taken from published meta-analyses, described in Table 2.<sup>8-10</sup> The log of the relative risks was assumed to be linearly related to absolute intakes across the full range of exposures in the dataset, including the low (but not null) RPM intakes reported by self-declared vegetarians. Stratum-specific relative risks were used to estimate proportional changes in aggregated population risks. These 'potential impact fractions' (PIF) were estimated separately for each sex, using the following equation:<sup>18</sup>

$$\text{PIF} = \frac{\text{current aggregate risk} - \text{aggregate risk under counterfactual}}{\text{current aggregate risk}}$$

$$= \frac{\sum p_{1i} \text{RR}_i - \sum p_{2i} \text{RR}_i}{\sum p_{1i} \text{RR}_i}$$

Where p refers to the proportion of the population in a given stratum; i identifies the stratum, and 1 and 2 identify the current and counterfactual intakes respectively. An overall PIF for each disease was calculated as the simple average of the values for males and females. Effects of reduced intakes of red and processed meat on colorectal cancer risk were assumed to be independent so that, for a given disease, the combined effect of both changes was estimated as: ((1-PIF<sub>1</sub>) x (1-PIF<sub>2</sub>)). This proportional change was then applied to WHO estimates for disease burdens in the UK for 2004.<sup>11</sup>

Proportional risk reductions were also estimated for the hypothetical scenario of reducing RPM from the mean level for F5 to a sustained intake at the mean for F1.

#### *Estimation of GHG emissions*

Diet-attributable GHG emissions were estimated for each stratum by multiplying mean intakes of each of the 45 food categories by their average emission value (Table 1), and summing resulting values. Estimated habitual intakes were used for red and processed meats, however as the proportional changes to other food categories (after adjustment of meat intakes from measured to estimated habitual) were negligible (less than 3%), values derived from reported intakes were used for these. Resulting dietary emissions estimates were energy-adjusted using the mean energy intake in the stratum, and standardised to the mean sex-specific energy intake in the overall sample.

1 Diet-attributable GHG emissions under the counterfactual were calculated for each sex as  
2 weighted means of strata V and F1 (proportions in V doubling and F1 intake applied to all  
3 non-vegetarians). The overall value was calculated as the simple average of means for each  
4 sex. The difference between counterfactual and current emissions values gave the expected  
5 average reduction in emissions from the specified changes in measured dietary *intakes* at 19-  
6 64y. These were then adjusted for average energy requirements in the total population  
7 relative to the study sample (which was restricted to ages 19 to 64). This adjustment factor  
8 was estimated at 0.93.<sup>19</sup> Finally, the change in emissions based on measured intakes was  
9 rescaled to the level of the food supply supporting the measured intakes. This was based on  
10 the FAO Food Balance Sheet estimates, which give total meat available for consumption in  
11 Britain as 219 g/person/d, compared with the measured intakes of 104 g/person/d. This ratio  
12 for meats was used as an estimate for inflation of total dietary GHG emissions, although it is  
13 accepted that wastage varies between food groups. No attempt was made to model the effects  
14 of reducing waste.

## 27 Results

28 RPM intakes show marked heterogeneity across the British population, with habitual intakes  
29 around 2.5 times higher in the top (F5) than in the bottom (F1) fifth of non-vegetarians. Under  
30 our counterfactual, 4.7% of males and 12.3% of females were vegetarian and the remainder  
31 adopted the sex-specific dietary pattern of F1. Average RPM intakes were reduced from 91 to  
32 53 g/d in males and from 54 to 30 g/d in females (42% and 44% reductions respectively), as  
33 shown in Figure 1.

### 39 *Changes in disease risks*

40 Assuming epidemiologically observed risk associations are causal and independent, risk  
41 reductions for the 3 diseases of interest would range from 3.2 to 12.1% under the  
42 counterfactual scenario (see Table 3). Benefits would be greatest in those with the highest  
43 current intakes (F5; see Table 4).

### 49 *Changes in greenhouse gas emissions*

50 Total daily GHG emissions attributable to measured dietary intakes were estimated at 4.58 kg  
51 CO<sub>2</sub>-e in males and 3.34 kg CO<sub>2</sub>-e in females (unweighted mean 3.96 kg CO<sub>2</sub>-e). The sex  
52 difference disappeared when emissions were expressed per MJ of dietary energy (0.47 kg  
53 CO<sub>2</sub>-e/MJ in males, 0.49 kg CO<sub>2</sub>-e/MJ in females). Red meat intake accounted for 31% of  
54 dietary CO<sub>2</sub>-e emissions in males and 27% in females, with processed meat accounting for an  
55 additional 10% and 8% in males and females respectively.



1 CO<sub>2</sub>-e emissions attributable to diet are shown for each stratum in Figure 2. Emissions for  
2 males increased by one third from F1 to F5 and for females by one quarter. Emissions  
3 attributable to dietary constituents other than red and processed meat were relatively constant  
4 across strata.  
5  
6

7  
8  
9 Diet-related emissions, calculated on the basis of intakes, were reduced by 0.47 kg CO<sub>2</sub>-  
10 e/person/d (or 12%) to 3.96 kg CO<sub>2</sub>-e/person/d in males and 3.02 kg CO<sub>2</sub>-e/person/d in  
11 females. Scaling this estimate up to the food supplies supporting these intakes increases the  
12 expected reduction to 1.23 kg CO<sub>2</sub>-e/person/d or 0.45 tonnes/person/y. For the 2009 UK  
13 population of 61,792,000 this amounts to a total GHG reduction of 27.8 m tonnes/y.  
14  
15  
16

## 17 18 19 20 **Discussion**

21  
22 We have identified a low red and processed meat dietary pattern that is already followed by a  
23 substantial fraction of the UK population, and estimated health and environmental benefits  
24 that would result from its general adoption. This is a deliberately heuristic exercise, intended  
25 to inform policy over the decadal timeframes familiar in climate change deliberations.  
26  
27

28  
29 We estimate that sustained dietary intakes at our counterfactual levels would materially  
30 reduce incidence of coronary heart disease, diabetes mellitus and colorectal cancer. These  
31 estimates are approximate, and our method of calculation could not allow for confounding on  
32 the outcome.<sup>20</sup> Although the dietary intake data used here was collected 10 years ago, the  
33 headline results from a more recent NDNS (fieldwork carried out 2008/9) reveal that intakes  
34 of all meat categories were broadly similar although slightly higher than in 2000/1.<sup>21</sup> This  
35 indicates that our estimates remain relevant and may even be conservative, and highlights the  
36 need for action to prevent further increases in intake in the UK population. We have not  
37 considered beneficial effects from compensatory increases in other dietary components,  
38 especially fruit and vegetables and dietary fibre. Other assessments of the health effects of  
39 broadly similar dietary changes have found these beneficial effects to be of even greater  
40 magnitude than the reductions in harms.<sup>22</sup> We only considered a limited range of diseases: the  
41 incidence of stroke and a wider range of cancers could also be expected to decline.<sup>23</sup>  
42  
43  
44  
45  
46  
47  
48  
49  
50

51 We use meta-analyses of a limited number of reports of the association between intakes of  
52 different types of meat and the risks of vascular disease and diabetes, rather than simply  
53 regarding meat as a vehicle for dietary fats and assuming all associated risks to be mediated  
54 via effects on blood lipids.<sup>23</sup> This food-based approach to assessing the health effects of meat  
55 is supported by the failure of epidemiological studies to confirm expected associations  
56 between intakes of unprocessed red meat and risk of coronary heart disease, by the differing  
57  
58  
59  
60

1 patterns of epidemiological association with unprocessed and processed red meat, and by the  
2 evidence that red and processed meat intakes are associated with other vascular risk factors,  
3 notably blood pressure.<sup>24,25</sup>  
4

5  
6  
7 Using 2004 Global Burden of Disease estimates for the UK<sup>26</sup> and assuming effects on  
8 incidence-based disease burdens are proportional to effects on incidence, the reduction in  
9 health losses under the counterfactual would be 50,960 disability-adjusted life years (DALYs)  
10 per year for ischemic heart disease, 5,421 DALYs per year for diabetes and 13,761 DALYs  
11 per year for colorectal cancer. If effects on these diseases were independent of each other,  
12 total reduction in DALYs would be 70,142/y, equivalent to almost 1% of health losses from  
13 all causes in the UK in 2004.  
14

15  
16  
17 The predicted reduction in GHG emissions would equate to a total saving in UK food and  
18 drink associated emissions of 27.8 million tonnes CO<sub>2</sub>-e/y across the 2009 UK population. To  
19 put this into context, the UK GHG 'footprint' has been estimated (using production-based  
20 accounts) at 10.16 tonnes CO<sub>2</sub>-e/person/y.<sup>27,28</sup> Total emissions attributable to UK consumers  
21 will exceed this by perhaps 30 to 40% due to large net imports of embedded GHG.<sup>29</sup> This  
22 implies that *consumption*-based emissions are over 14 tonnes CO<sub>2</sub>-e/person/y. Emissions  
23 reductions under the counterfactual therefore represent a saving of over 3% of this figure, a  
24 worthwhile amount given that addressing climate change mitigation is going to require the  
25 adding up of contributions from diverse sources.  
26  
27

28  
29 We found that around one-quarter of the UK population had habitual intakes of red and  
30 processed meat below 55 g/d and 27g/d for men and women respectively, representing around  
31 two-thirds (62%) and one-half (51%) of their sex-specific means. Examination of the rest of  
32 the diet revealed that some, but far from all, of this reduction was offset by increased white  
33 meat intake, and remaining dietary substitution for RPM came from a wide variety of other  
34 sources.<sup>10</sup> When considering both health and environmental effects of reducing RPM  
35 consumption, substitute foods are important, and clear advice should be given regarding these  
36 in order that benefits are maximised.  
37

38  
39 Intakes of RPM are socially patterned, especially in females. Forty-five percent of low (F1)  
40 but only 29% of high (F5) RPM strata for females, were in social class I or II and 41% versus  
41 19% had formal education beyond A level.<sup>12</sup> Given that inequalities in health outcomes are  
42 produced by inequalities in health determinants, a downward convergence of RPM intakes  
43 would yield a third benefit: a reduction in health inequalities. This is illustrated by the large  
44 potential risk reductions available to high consumers were they to converge down to the  
45 intakes of the low consumers.  
46  
47  
48  
49  
50  
51  
52  
53  
54  
55  
56  
57  
58  
59  
60

1 Dietary recommendations should no longer be based on direct health effects alone. Whilst the  
2 UK Government has acknowledged the environmental impact of livestock production and is  
3 taking action with the industry to improve efficiency,<sup>30</sup> changes in production will be  
4 insufficient alone to meet challenging emission reduction targets. Joint producer and  
5 consumer responsibility is needed, supported by the use of both production- and  
6 consumption-based GHG accounts. Averting dangerous climate change will require multiple  
7 changes at all levels of society, and the potential contribution of reduced red and processed  
8 meat consumption should be addressed.

## 15 References

- 17 <sup>1</sup> Costello A, Abbas M, Allen A, Ball S, Bell S, Bellamy R, et al. Managing the health  
18 effects of climate change: Lancet and University College London Institute for Global  
19 Health Commission. *Lancet*. 2009; 373(9676):1693-733.
- 22 <sup>2</sup> Garnett T. *Cooking up a storm: Food, greenhouse gas emissions and our changing  
23 climate*. Guildford: Food Climate Research Network; 2008.
- 26 <sup>3</sup> Audsley E, Brander M, Chatterton J, Murphy-Bokern D, Webster C, Williams A. *How  
27 low can we go? An assessment of greenhouse gas emissions from the UK food system  
28 and the scope for reduction by 2050*. Godalming: WWF-UK; 2010.
- 31 <sup>4</sup> Food and Agriculture Organisation. *Livestock's Long Shadow: Environmental Issues  
32 and Options*. Rome: FAO; 2006.
- 35 <sup>5</sup> McMichael AJ, Powles JW, Butler CD, Uauy R. Energy and health 5 - Food, livestock  
36 production, energy, climate change, and health. *Lancet*. 2007; 370(9594):1253-63.
- 39 <sup>6</sup> Erb K-H, Haberl H, Krausmann K, Lauk C, Plutzer C, Steinberger JK, et al. *Eating the  
40 Planet: Feeding and fuelling the world sustainably, fairly and humanely - a scoping  
41 study*. Commissioned by Compassion in World Farming and Friends of the Earth UK.  
42 Vienna: Institute of Social Ecology; 2009.
- 45 <sup>7</sup> Committee on Climate Change. *The fourth carbon budget: reducing emissions through  
46 the 2020s* [online] Available at <http://www.theccc.org.uk/reports/fourth-carbon-budget>  
47 [Accessed 28 June 2011]. London: Committee on Climate Change; 2010.
- 50 <sup>8</sup> WCRF/AICR. *Food, Nutrition, Physical Activity and the Prevention of Cancer: a  
51 Global Perspective*. Washington DC: AICR; 2007.
- 54 <sup>9</sup> Norat T, Chan D, Lau R, Aune D, Vieira R. The associations between food, nutrition  
55 and physical activity and the risk of colorectal cancer: WCRF/AICR Systematic

- 1  
2 Literature Review Continuous Update Project Report. Imperial College London:  
3 WCRF/AICR; 2010.  
4  
5  
6<sup>10</sup> Micha R, Wallace S, Mozaffarian D. Red and processed meat consumption and risk of  
7 incident coronary heart disease, stroke, and diabetes mellitus: a systematic review and  
8 meta-analysis. *Circulation*. 2010; v121(21):2271-83.  
9  
10  
11<sup>11</sup> World Health Organisation. Global Burden of Disease death and DALY country  
12 estimates [online] Available at  
13 [http://www.who.int/healthinfo/global\\_burden\\_disease/gbddeathdalycount](http://www.who.int/healthinfo/global_burden_disease/gbddeathdalycount): [Accessed  
14 20 September 2011] WHO; 2009.  
15  
16  
17  
18  
19<sup>12</sup> Office for National Statistics. National Diet and Nutrition Survey: Adults aged 19 to  
20 64 years, 2000-2001 [computer file] SN: 5140. Colchester, Essex: UK Data Archive  
21 [distributor]; 2005.  
22  
23  
24  
25  
26  
27  
28  
29  
30  
31  
32  
33  
34  
35  
36  
37  
38  
39  
40  
41  
42  
43  
44  
45  
46  
47  
48  
49  
50  
51  
52  
53  
54  
55  
56  
57  
58  
59  
60
- <sup>13</sup> Aston LM, Smith J, Powles JW. Patterns of meat intake in Britain, their relation to other dietary components and their associations with demographic and risk factor variables: estimates based on disaggregation of meat dishes in the National Diet and Nutrition Survey of 2000/2001. Under Review; 2011.
- <sup>14</sup> Henderson L, Gregory J, Swann G. The National Diet and Nutrition Survey: adults aged 19 to 64 years. Volume 1: Types and quantities of foods consumed. Norwich: HMSO; 2002.
- <sup>15</sup> Department for Environment Food and Rural Affairs. Scenario building to test and inform the development of a BSI method for assessing GHG emissions from food. Research project final report FO0404. London: DEFRA; 2009.
- <sup>16</sup> Wallen A, Brandt N, Wennersten R. Does the Swedish consumer's choice of food influence greenhouse gas emissions? *Environmental Science and Policy*. 2004; 7:525-35.
- <sup>17</sup> Murray CJL, Lopez AD On the comparable quantification of health risks: lessons from the Global Burden of Disease study. *Epidemiology*. 1999; 10:594-605
- <sup>18</sup> Ezzati M, Lopez AD, Rodgers A, Van der Hoorn S, Murray CJ. Selected major risk factors and global and regional burden of disease. *Lancet*. 2002; 360(9343):1347-60.
- <sup>19</sup> Schofield WN Predicting basal metabolic rate, new standards and review of previous work. *Human Nutrition Clinical Nutrition*. 1985; 39(S1):5-41.

- 1  
2  
3  
4  
5  
6  
7  
8  
9  
10  
11  
12  
13  
14  
15  
16  
17  
18  
19  
20  
21  
22  
23  
24  
25  
26  
27  
28  
29  
30  
31  
32  
33  
34  
35  
36  
37  
38  
39  
40  
41  
42  
43  
44  
45  
46  
47  
48  
49  
50  
51  
52  
53  
54  
55  
56  
57  
58  
59  
60
- 20 Rockhill B, Newman B, Weinberg C. Use and misuse of population attributable fractions. *American Journal of Public Health*. 1998; 88(1):15-9.
- 21 Food Standards Agency. Tables – NDNS Headline results from Year 1 of the Rolling Programme (2008/9) [online] Available at <http://www.food.gov.uk/science/dietarysurveys/ndnsdocuments/ndns0809year1> [Accessed 15 July 2010] FSA; 2010.
- 22 Scarborough P, Noaham KE, Clarke D, Capewell S, Rayner M. Modelling the impact of a healthy diet on cardiovascular disease and cancer mortality. *Journal of Epidemiology and Community Health*. 2010; epub doi:10.1136/jech.2010.114520.
- 23 Friel S, Dangour AD, Garnett T, Lock K, Chalabi Z, Roberts I, Butler A, Butler CD, Waage J, McMichael AJ, et al. Public health benefits of strategies to reduce greenhouse-gas emissions: food and agriculture. *Lancet*. 2009; 374:2016-25.
- 24 Miura K, Greenland P, Stamler J, Liu K, Daviglius ML, Nakagawa H. Relation of Vegetable, Fruit, and Meat Intake to 7-Year Blood Pressure Change in Middle-aged Men: The Chicago Western Electric Study. *American Journal of Epidemiology*. 2004; 159(6):572-80.
- 25 Steffen LM, Kroenke CH, Yu X, Pereira MA, Slattery ML, Van HL, Gross MD, Jacobs DR, Jr. Associations of plant food, dairy product, and meat intakes with 15-y incidence of elevated blood pressure in young black and white adults: the Coronary Artery Risk Development in Young Adults (CARDIA) Study. *American Journal of Clinical Nutrition*. 2005; 82(6):1169-77.
- 26 WHO Global Health Observatory Data Repository. Death and DALY estimates for 2004 by cause for WHO member states [online] Available at <http://apps.who.int/ghodata/?vid=10011> [Accessed 20 September 2011]. Geneva: WHO; 2009.
- 27 Department for Environment Food and Rural Affairs. The environment in your pocket. Norwich: The Stationery Office; 2009.
- 28 Office for National Statistics. Population estimates. <http://www.statistics.gov.uk/cci/nugget.asp?id=6>: ONS; 2010.
- 29 Davis S, Caldeira K. Consumption-based accounting of CO<sub>2</sub> emissions. *PNAS*. 2010; 107(12):5687-92.
- 30 EBLEX. Change in the air: The English beef and sheep production roadmap. Kenilworth: EBLEX; 2009.

**Table 1:** Greenhouse gas emissions, expressed as CO<sub>2</sub>-equivalents/kg food produced for consumption in the UK\*

| Food Category                        | GHG emissions (kg CO <sub>2</sub> -e/kg) | Inclusions/Notes            | Source                     |
|--------------------------------------|------------------------------------------|-----------------------------|----------------------------|
| <b>Unprocessed Meat</b>              |                                          |                             |                            |
| 1 Beef                               | 30.00                                    |                             | DEFRA <sup>15</sup>        |
| 2 Lamb                               | 50.00                                    |                             | DEFRA <sup>15</sup>        |
| 3 Pork                               | 10.00                                    |                             | DEFRA <sup>15</sup>        |
| 4 Other red meat <sup>i</sup>        | 30.00                                    | Venison, Goat               | Mean beef/pork/lamb        |
| 5 White meat <sup>ii</sup>           | 4.00                                     | Chicken, turkey, game birds | DEFRA <sup>15</sup>        |
| 6 Other birds                        | 5.32                                     | Duck, goose                 | DEFRA <sup>15</sup>        |
| <b>Processed Meat <sup>iii</sup></b> |                                          |                             |                            |
| 7 Processed beef                     | 30.00                                    |                             | = beef                     |
| 8 Processed pork                     | 10.00                                    | Sausagemeat, bacon, ham     | = pork                     |
| 9 Processed white meat               | 4.00                                     |                             | = white meat               |
| <b>Fish</b>                          |                                          |                             |                            |
| 10 Fresh fish/shellfish              | 2.60                                     |                             | Wallen et al <sup>16</sup> |
| 11 Frozen fish                       | 6.50                                     |                             | Wallen et al <sup>16</sup> |
| <b>Dairy/Eggs</b>                    |                                          |                             |                            |
| 12 Milk                              | 1.30                                     | Yoghurt, cream, custard     | DEFRA <sup>15</sup>        |
| 13 Cheese                            | 9.80                                     |                             | Wallen et al <sup>16</sup> |
| 14 Ice cream                         | 0.64                                     |                             | Wallen et al <sup>16</sup> |
| 15 Egg                               | 3.00                                     |                             | DEFRA <sup>15</sup>        |
| <b>Starchy Staples</b>               |                                          |                             |                            |
| 16 Bread                             | 0.73                                     |                             | DEFRA <sup>15</sup>        |
| 17 Breakfast cereal                  | 1.00                                     |                             | Wallen et al <sup>16</sup> |
| 18 Pasta                             | 0.81                                     |                             | Wallen et al <sup>16</sup> |
| 19 Rice                              | 1.68                                     |                             | Wallen et al <sup>16</sup> |
| 20 Unprocessed potato                | 0.16                                     |                             | DEFRA <sup>15</sup>        |
| 21 Frozen potato                     | 0.57                                     |                             | Wallen et al <sup>16</sup> |
| 22 Other potato products             | 2.37                                     |                             | Wallen et al <sup>16</sup> |
| 23 Flour/other grains                | 1.00                                     |                             | Wallen et al <sup>16</sup> |
| <b>Fruit &amp; Vegetables</b>        |                                          |                             |                            |
| 24 Vegetables (1)                    | 0.50                                     | Roots, onions, brassicas    | Wallen et al <sup>16</sup> |
| 25 Vegetables (2)                    | 3.30                                     | All other, including salad  | Wallen et al <sup>16</sup> |
| 26 Pulses                            | 0.64                                     | Dried/tinned                | Wallen et al <sup>16</sup> |
| 27 Tomato <sup>g</sup>               | 2.00                                     | Including tinned            | DEFRA <sup>15</sup>        |
| 28 Fruit                             | 0.40                                     | All                         | Wallen et al <sup>16</sup> |
| <b>Fats</b>                          |                                          |                             |                            |
| 29 Butter                            | 0.98                                     |                             | Wallen et al <sup>16</sup> |
| 30 Margarine                         | 2.12                                     |                             | Wallen et al <sup>16</sup> |
| 31 Cooking oil                       | 3.53                                     |                             | Wallen et al <sup>16</sup> |
| <b>Other</b>                         |                                          |                             |                            |
| 32 Crispbread/biscuits               | 2.65                                     |                             | Wallen et al <sup>16</sup> |
| 33 Buns/cakes                        | 0.91                                     |                             | Wallen et al <sup>16</sup> |
| 34 Chocolate/sweets                  | 1.80                                     |                             | Wallen et al <sup>16</sup> |
| 35 Sugar/honey/treacle               | 4.18                                     |                             | Wallen et al <sup>16</sup> |
| 36 Jam/marmalade                     | 0.81                                     | Including chutneys          | Wallen et al <sup>16</sup> |
| <b>Beverages</b>                     |                                          |                             |                            |
| 37 Soft beverages                    | 0.56                                     |                             | Wallen et al <sup>16</sup> |
| 38 Mineral water                     | 0.56                                     |                             | = soft beverages           |
| 39 Alcoholic beverages               | 0.56                                     |                             | = soft beverages           |
| 40 Fruit juice/syrup                 | 0.99                                     | Including cordials          | Wallen et al <sup>16</sup> |
| 41 Coffee                            | 33.00                                    |                             | DEFRA <sup>15</sup>        |
| 42 Tea                               | 4.10                                     | Including herbal tea        | DEFRA <sup>15</sup>        |
| 43 Cocoa                             | 210.00                                   | Including hot chocolate     | DEFRA <sup>15</sup>        |
| 44 Tap water                         | 0.00                                     | Including that in foods     | No data                    |
| 45 <b>Miscellaneous</b>              | 1.85                                     | All other                   | Mean of all                |

1  
2 \* Emission estimates are preferentially based on life cycle analyses. Where emissions vary by production  
3 system within and beyond the UK, values are averages weighted on contributions to the UK food supply.

4 Further details in Web Appendix: Assumptions and methods used in the derivation of greenhouse gas  
5 emissions from food produced for UK consumers.  
6

7 The following definitions were used, consistent those used in the meta-analyses of intake-risk associations:

8 *i* **Red meat** as beef, veal, pork, lamb, mutton and goat, either fresh, minced (including hamburgers) or  
9 frozen, but unprocessed other than by cooking with heat. Although processed meats were primarily red  
10 meats, the term 'red meat' has been used in this report to refer to 'unprocessed red meat', unless otherwise  
11 specified.

12 *ii* **White meat** as meat from poultry, fresh, minced or frozen, but unprocessed other than by cooking with  
13 heat.

14 *iii* **Processed meat** as meat preserved by smoking, curing, salting or addition of nitrates, nitrites or other  
15 preservatives. Under this definition, processed meats were primarily red, but included white meats, and  
16 included ham, bacon, pastrami, salami, sausages and processed deli or luncheon meats.  
17  
18  
19  
20  
21  
22  
23  
24  
25  
26  
27  
28  
29  
30  
31  
32  
33  
34  
35  
36  
37  
38  
39  
40  
41  
42  
43  
44  
45  
46  
47  
48  
49  
50  
51  
52  
53  
54  
55  
56  
57  
58  
59  
60

**Table 2:** Relative risks of incident coronary heart disease, diabetes mellitus and colorectal cancer for differences of 100 g/d usual intakes of red and 50 g/d of usual intakes of processed meat from two meta-analyses

| Exposure                           | Disease                | Relative Risk (95% CI) | Meta-analysis             | Comments                                                                                                                                                                                                                                                                                                                                      |
|------------------------------------|------------------------|------------------------|---------------------------|-----------------------------------------------------------------------------------------------------------------------------------------------------------------------------------------------------------------------------------------------------------------------------------------------------------------------------------------------|
| Red meat*<br>(RR per 100 g/d)      | Coronary heart disease | 1.00 (0.81, 1.23)      | Micha et al <sup>10</sup> | Based on 4 estimates; most controlled for total energy intake. No between-study heterogeneity or publication bias was evident. The range of exposures across all included studies (means in lowest/highest categories) was 15.7–118.6 g/d.                                                                                                    |
|                                    | Diabetes mellitus      | 1.16 (0.92, 1.46)      | Micha et al <sup>10</sup> | Based on 5 estimates; most controlled for total energy intake. No between-study heterogeneity or publication bias was evident. The range of exposures across all included studies (means in lowest/highest categories) was 15.7–118.6 g/d.                                                                                                    |
|                                    | Colorectal cancer      | 1.17 (1.05, 1.31)      | WCRF/AICR <sup>9</sup>    | Based on 8 cohort studies; most controlled for total energy intake. There was no evidence of heterogeneity was present and a random-effects model was used. There were insufficient studies to check for publication bias. Intakes per category spanned the range 1 – >200g/d.                                                                |
| Processed meat*<br>(RR per 50 g/d) | Coronary heart disease | 1.42 (1.07, 1.89)      | Micha et al <sup>10</sup> | Based on 6 estimates; most controlled for total energy intake. Between-study heterogeneity and publication bias were evident; sensitivity analysis did not significantly change the outcome, and a random-effects model was used. The range of exposures across all included studies (means in lowest/highest categories) was 2.9 – 40.7 g/d. |
|                                    | Diabetes mellitus      | 1.19 (1.11, 1.27)      | Micha et al <sup>10</sup> | Based on 6 estimates; most controlled for total dietary energy. Some heterogeneity was evident, but publication bias was not; sensitivity analysis did not significantly change the outcome, and a random-effects model was used. The range of exposures across all studies (means in lowest/highest categories) was 2.9 – 40.7 g/d.          |
|                                    | Colorectal cancer      | 1.18 (1.10, 1.28)      | WCRF/AICR <sup>9</sup>    | Based on 9 cohort studies; most controlled for total energy intake. Low heterogeneity was present and a random-effects model was used. Publication bias was not evident. Intakes per category spanned the range 1 – >100 g/d.                                                                                                                 |

\* For definitions see text



**Table 3:** Predicted reductions (%) in population risks of coronary heart disease, diabetes and colorectal cancer from sustained exposure at counterfactual intakes of red and processed meat and both (assuming independence of effects)

|                               | Red meat      |               | Processed meat |               | Red plus processed meat |               |
|-------------------------------|---------------|---------------|----------------|---------------|-------------------------|---------------|
|                               | % risk change | (95% CI*)     | % risk change  | (95% CI*)     | % risk change           | (95% CI*)     |
| <b>Coronary heart disease</b> |               |               |                |               |                         |               |
| Males                         | NS            | -             | -9.6           | (-1.8, -18.0) | N/A                     | -             |
| Females                       | NS            | -             | -6.4           | (-1.2, -11.8) | N/A                     | -             |
| <b>Diabetes mellitus</b>      |               |               |                |               |                         |               |
| Males                         | NS            | -             | -4.6           | (-2.8, -7.3)  | N/A                     | -             |
| Females                       | NS            | -             | -3.2           | (-1.9, -4.7)  | N/A                     | -             |
| <b>Colorectal cancer</b>      |               |               |                |               |                         |               |
| Males                         | -7.9          | (-2.4, -13.5) | -4.5           | (-2.4, -7.2)  | -12.1                   | (-6.4, -17.8) |
| Females                       | -4.8          | (-1.4, -8.3)  | -3.0           | (-1.6, -4.7)  | -7.7                    | (-4.0, -11.3) |

\* Estimated by Monte Carlo simulation, using @Risk software (Palisade, New York)

NS=Non-significant; N/A=Not applicable (as for processed meat)

**Table 4:** Predicted reductions (%) in risks of coronary heart disease, diabetes and colorectal cancer for persons with usual intakes at the mean levels for F5 had they had sustained exposure at usual intakes for F1 of red and processed meat and both (assuming independence of effects)

|                               | Red meat      |               | Processed meat |               | Red plus processed meat |                |
|-------------------------------|---------------|---------------|----------------|---------------|-------------------------|----------------|
|                               | % risk change | (95% CI*)     | % risk change  | (95% CI*)     | % risk change           | (95% CI*)      |
| <b>Coronary heart disease</b> |               |               |                |               |                         |                |
| Males                         | NS            | -             | -20.2          | (-4.1, -35.3) | N/A                     | -              |
| Females                       | NS            | -             | -11.0          | (-2.2, -20.0) | N/A                     | -              |
| <b>Diabetes mellitus</b>      |               |               |                |               |                         |                |
| Males                         | NS            | -             | -10.5          | (-6.4, -15.7) | N/A                     | -              |
| Females                       | NS            | -             | -5.7           | (-3.3, -8.4)  | N/A                     | -              |
| <b>Colorectal cancer</b>      |               |               |                |               |                         |                |
| Males                         | -15.5         | (-4.9, -25.6) | -10.3          | (-5.5, -15.5) | -24.2                   | (-13.6, -34.1) |
| Females                       | -11.3         | (-3.4, -19.0) | -5.4           | (-2.8, -8.4)  | -16.1                   | (-8.4, -23.7)  |

\* Estimated by Monte Carlo simulation, using @Risk software (Palisade, New York)

NS=Non-significant; N/A=Not applicable (as for processed meat)

**Figure 1:** Reported and estimated habitual intakes of red plus processed meat across strata based on energy-adjusted red and processed meat intake (mean and 95% confidence interval). Intakes in mean g/d following energy-adjustment and standardisation to sex-specific mean total reported energy intake. Overall factual and counterfactual (CF) mean intakes are also shown.

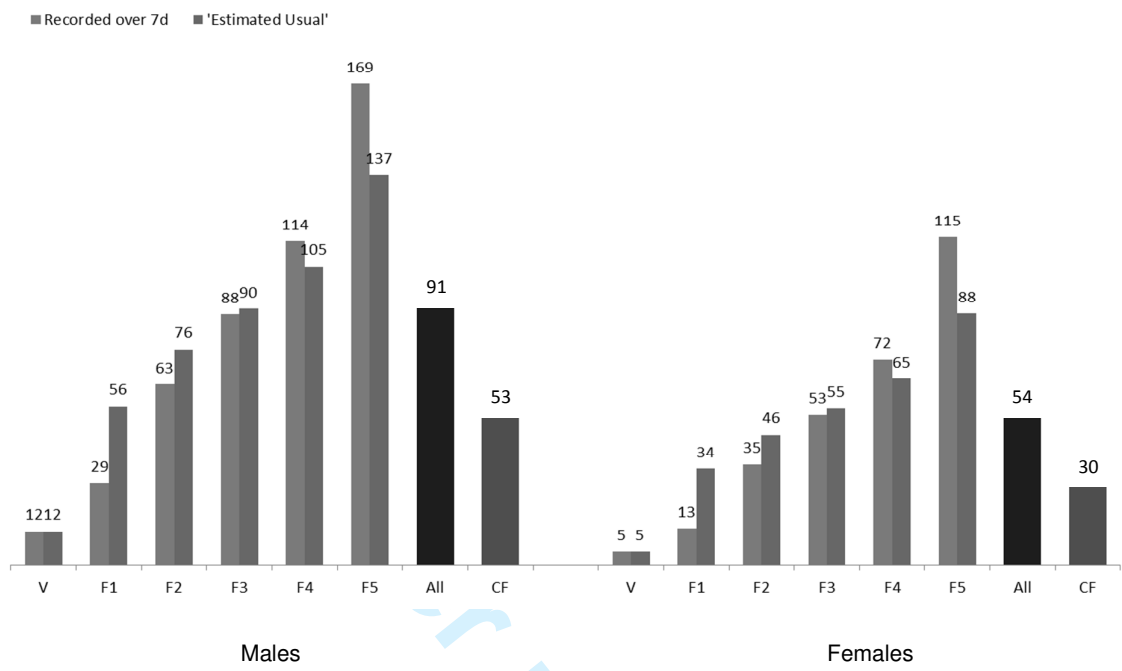

V=Vegetarian; F1-5= Fifths of energy-adjusted red + processed meat intake (F1=lowest intake); CF=counterfactual

1  
2  
3  
4  
5  
6  
7  
8  
9  
10  
11  
12  
13  
14  
15  
16  
17  
18  
19  
20  
21  
22  
23  
24  
25  
26  
27  
28  
29  
30  
31  
32  
33  
34  
35  
36  
37  
38  
39  
40  
41  
42  
43  
44  
45  
46  
47  
48  
49  
50  
51  
52  
53  
54  
55  
56  
57  
58  
59  
60

**Figure 2:** Diet-related standardised energy-adjusted CO<sub>2</sub>-e emissions according to dietary component across sex-specific categories of energy-adjusted red plus processed meat intake (based on estimated habitual intake of red and processed meats)

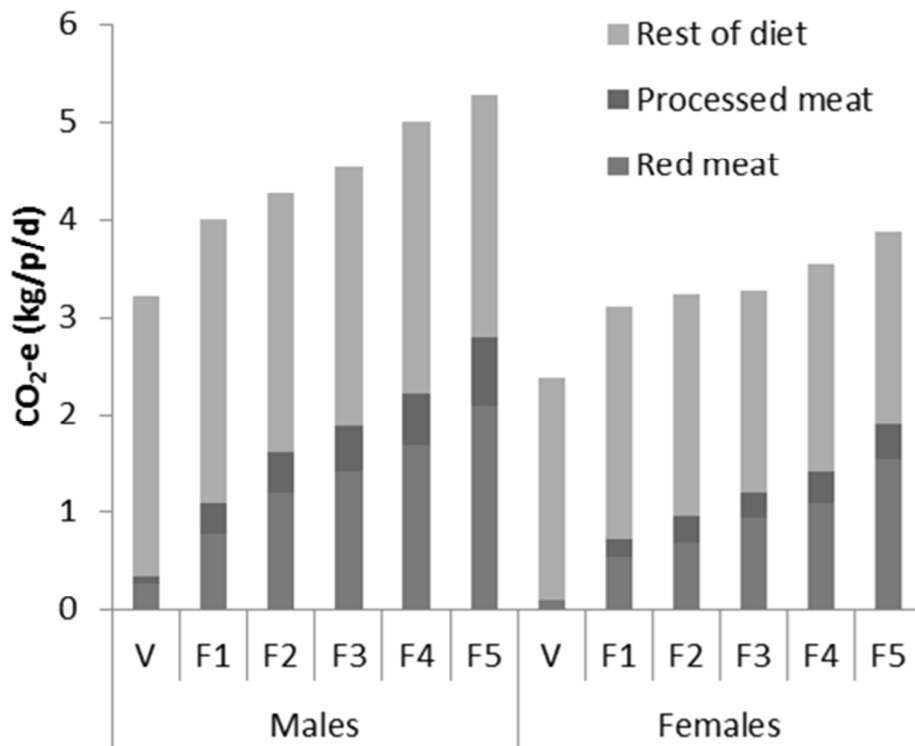

V=Vegetarian; F1-5=Fifths of energy-adjusted red plus processed meat intake (F1=lowest intake)

View only

## Web Appendix: Assumptions and methods used to estimate greenhouse gas emissions from producing foods for UK consumers

### Beef

Values for beef varied 4-fold according to the production system, with the value for Brazilian beef reflecting transport emissions. Values from DEFRA<sup>i</sup> were as follows:

|                      |                                          |
|----------------------|------------------------------------------|
| UK Intensive Dairy   | 10 kg CO <sub>2</sub> -e/kg hung carcass |
| UK Extensive Suckler | 30 kg CO <sub>2</sub> -e/kg hung carcass |
| UK Organic Suckler   | 32 kg CO <sub>2</sub> -e/kg hung carcass |
| Brazil Suckler       | 40 kg CO <sub>2</sub> -e/kg hung carcass |

The UK has 80% self sufficiency in beef production,<sup>ii</sup> with equal quantities of UK beef coming from dairy and suckler herds.<sup>iii,iv</sup> Consumption of organic beef is negligible, at around 1%.<sup>v</sup> This was therefore ignored, particularly since emissions were similar to those for suckler cattle. 65% of beef imports to the UK come from Ireland and other EU countries, which were assumed to have the UK average value of 20 kg CO<sub>2</sub>-e/kg hung carcass. A further 21% of UK beef comes from South America, for which the Brazil value was assumed, and the final 14% from 'other' countries, for which the average of UK and Brazilian beef was assumed (30 kg CO<sub>2</sub>-e/kg hung carcass). 1 kg of hung carcass produces 0.7 kg bone-free meat.<sup>vi</sup> According to this information, a weighted average CO<sub>2</sub>-e value was calculated to be 30 kg CO<sub>2</sub>-e/kg, using the following equation:

$$((0.40 \times 10) + (0.40 \times 30) + (0.13 \times 20) + (0.042 \times 40) + (0.028 \times 30)) / 0.7 = 30 \text{ kg CO}_2\text{-e/kg}$$

### Lamb

Values for UK-consumed lamb were obtained from DEFRA,<sup>i</sup> as follows:

|                      |                                          |
|----------------------|------------------------------------------|
| UK Intensive Lowland | 28 kg CO <sub>2</sub> -e/kg hung carcass |
| UK Extensive Upland  | 39 kg CO <sub>2</sub> -e/kg hung carcass |
| UK Organic Lowland   | 27 kg CO <sub>2</sub> -e/kg hung carcass |
| New Zealand          | 33 kg CO <sub>2</sub> -e/kg hung carcass |

The UK is 85% self-sufficient in lamb production,<sup>iv</sup> with around 70% of this being upland lamb and the remaining 30% lowland.<sup>iii</sup> As for beef, organic was assumed to be negligible. 90% of UK imports originate from New Zealand, Australia or South America, for which the New Zealand value was assumed. The remaining 10% originate from Ireland or other EU countries, for which the UK average of 36 kg CO<sub>2</sub>-e/kg was assumed. 1 kg of hung carcass produces 0.7 kg bone-free meat (personal communication with EBLEX). A weighted average value for lamb was therefore calculated to be 50 kg CO<sub>2</sub>-e/kg:

$$((0.60 \times 39) + (0.25 \times 28) + (0.135 \times 33) + (0.015 \times 36)) / 0.7 = 50 \text{ kg CO}_2\text{-e/kg}$$

## Pork

GHG emissions from pork produced under different systems were obtained from DEFRA:<sup>i</sup>

|                      |                                           |
|----------------------|-------------------------------------------|
| UK Intensive Indoor  | 5.5 kg CO <sub>2</sub> -e/kg hung carcass |
| UK Extensive Outdoor | 8.9 kg CO <sub>2</sub> -e/kg hung carcass |
| UK Organic Outdoor   | 9.9 kg CO <sub>2</sub> -e/kg hung carcass |

The UK is 47% self-sufficient in pork production, with 70% being indoor reared.<sup>vii</sup> As above, organic production was assumed as negligible. Imports to the UK come entirely from the EU. This production was assumed to be intensive and the figure for UK intensive production was adopted and rounded to 6 to allow a small amount for road transport. 1 kg hung pork carcass produces 0.6 kg bone-free meat.<sup>vi</sup> A weighted average for pork was calculated as 10 kg CO<sub>2</sub>-e/kg:  $((0.33 \times 5.5) + (0.14 \times 8.9) + (0.53 \times 6)) / 0.6 = 10 \text{ kg CO}_2\text{-e/kg}$

## Chicken

Values for chicken were obtained from DEFRA:<sup>i</sup>

|                      |                                           |
|----------------------|-------------------------------------------|
| UK Intensive Indoor  | 3.1 kg CO <sub>2</sub> -e/kg hung carcass |
| UK Extensive Outdoor | 3.7 kg CO <sub>2</sub> -e/kg hung carcass |
| UK Organic Outdoor   | 4.1 kg CO <sub>2</sub> -e/kg hung carcass |

The UK is 90% self sufficient in chicken production, with 20% being outdoor or organically reared.<sup>viii</sup> As the value for organic production was close to that for outdoor, the value for outdoor was used for both. Imports to the UK are mainly from the EU, Brazil and Thailand, with much being shipped frozen from the non-EU countries. The UK intensive value was rounded to 3.5 to reflect road and ship transport. 1 kg hung carcass produces 0.77 kg bone-free meat.<sup>vi</sup> A weighted average was calculated as 4 kg CO<sub>2</sub>-e/kg:

$$((0.72 \times 3.1) + (0.18 \times 3.7) + (0.10 \times 3.5)) / 0.77 = 4 \text{ kg CO}_2\text{-e/kg}$$

This value was also applied to turkey, for which no data existed, and to game birds such as pheasant and quail.

## Duck

The same edible proportion was assumed as for chicken (0.77 kg/kg hung carcass).

Therefore, the GHG emissions per kg edible portion was calculated as 5.32 kg CO<sub>2</sub>-e/kg from the DEFRA<sup>i</sup> figure for hung carcass:  $4.1 / 0.77 = 5.32 \text{ kg CO}_2\text{-e/kg}$ . This figure was also applied to goose.

## Egg

The DEFRA<sup>i</sup> value for a dozen eggs was 1.8 kg CO<sub>2</sub>-e. The shell-free weight of 1 average egg is 50 g, therefore 12 eggs weigh 0.6 kg, and the value for 1 kg egg was calculated as 3.0 kg CO<sub>2</sub>-e/kg.

## Tomato

The following values for tomatoes were given by DEFRA:<sup>i</sup>

|                 |                               |
|-----------------|-------------------------------|
| Oil heated UK   | 2.3 kg CO <sub>2</sub> -e/kg  |
| Waste heated UK | 0.39 kg CO <sub>2</sub> -e/kg |
| Spanish         | 1.8 kg CO <sub>2</sub> -e/kg  |

The average of oil-heated UK and Spanish was calculated, then lowered slightly to represent a small proportion from waste heated production, to give a value of 2 kg CO<sub>2</sub>-e/kg.

## Mineral water and alcoholic beverages

In the absence of any data, the value for soft beverages was applied on the assumption that much of the impact would be due to bottling, packaging and transport, common to all of these.

## Miscellaneous

In the absence of any data or knowledge of food group, the average of all non-meat foods (excluding beverages) was calculated as 1.85 kg CO<sub>2</sub>-e/kg and applied to the proportion of foods classified as miscellaneous due to lack of information about the food or the GHG emissions.

---

<sup>i</sup> Department for Environment Food and Rural Affairs. Scenario building to test and inform the development of a BSI method for assessing GHG emissions from food. Research project final report FO0404. London: DEFRA; 2009.

<sup>ii</sup> House of Commons. Note SN/SC-01363. 2009.

<sup>iii</sup> EBLEX. Change in the air: The English beef and sheep production roadmap. Kenilworth: EBLEX; 2009.

<sup>iv</sup> Spedding A. RuSource Briefing 814: Feeding Britain - beef and sheep meat. London: Arthur Rank Centre; 2009.

<sup>v</sup> Red Meat Industry Forum. Introduction to beef production in UK. RMIF; 2007.

<sup>vi</sup> Cederberg C, Meyer D, Flysjo A. Life cycle inventory of greenhouse gas emissions and use of land and energy in Brazilian beef production. Sweden: SIK; 2009.

<sup>vii</sup> Spedding A. RuSource Briefing 815: Feeding Britain - pig meat. London; 2009.

<sup>viii</sup> Spedding A. RuSource Briefing 650: Poultry production. London: Arthur Rank Centre; 2008.

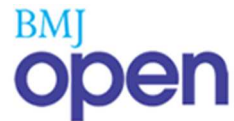

**Impact of a reduced red and processed meat dietary pattern on disease risks and greenhouse gas emissions in the UK: A modelling study**

|                                 |                                                                                                                                                                                                              |
|---------------------------------|--------------------------------------------------------------------------------------------------------------------------------------------------------------------------------------------------------------|
| Journal:                        | <i>BMJ Open</i>                                                                                                                                                                                              |
| Manuscript ID:                  | bmjopen-2012-001072.R1                                                                                                                                                                                       |
| Article Type:                   | Research                                                                                                                                                                                                     |
| Date Submitted by the Author:   | 28-Jun-2012                                                                                                                                                                                                  |
| Complete List of Authors:       | Aston, Louise; University of Cambridge, Institute of Public Health<br>Smith, James; University of Cambridge, Institute of Public Health<br>Powles, John; University of Cambridge, Institute of Public Health |
| <b>Primary Subject Heading</b>: | Public health                                                                                                                                                                                                |
| Secondary Subject Heading:      | Nutrition and metabolism, Cardiovascular medicine, Oncology                                                                                                                                                  |
| Keywords:                       | Meat intake, Climate, Diabetes risk, Coronary heart disease risk, Colorectal cancer risk                                                                                                                     |
|                                 |                                                                                                                                                                                                              |

SCHOLARONE™  
Manuscripts

1 Impact of a reduced red and processed meat dietary pattern on disease risks and greenhouse  
2 gas emissions in the UK: A modeling study  
3  
4

5  
6 Louise M Aston, James N Smith, John W Powles  
7

8  
9 Institute of Public Health, University of Cambridge, Forvie Site, Robinson Way, Cambridge,  
10 CB2 0SR, UK  
11

12 Louise M Aston

13 Specialty Registrar in Public Health

14 James N Smith

15 Specialty Registrar in Public Health

16 John W Powles

17 Senior Lecturer in Public Health Medicine  
18  
19  
20  
21

22 Correspondence to: [louise.aston@cantab.net](mailto:louise.aston@cantab.net)  
23  
24  
25  
26  
27  
28

29 Author contributions: All authors contributed to conception and design of the study. Data  
30 analysis and interpretation was performed by LMA and JWP. All authors contributed to  
31 manuscript preparation and have approved the submitted manuscript.  
32  
33  
34  
35  
36

37 Copyright: The Corresponding Author has the right to grant on behalf of all authors and does  
38 grant on behalf of all authors, a worldwide licence to the Publishers and its licensees in  
39 perpetuity, in all forms, formats and media (whether known now or created in the future), to i)  
40 publish, reproduce, distribute, display and store the Contribution, ii) translate the Contribution  
41 into other languages, create adaptations, reprints, include within collections and create  
42 summaries, extracts and/or, abstracts of the Contribution, iii) create any other derivative  
43 work(s) based on the Contribution, iv) to exploit all subsidiary rights in the Contribution, v)  
44 the inclusion of electronic links from the Contribution to third party material where-ever it  
45 may be located; and, vi) licence any third party to do any or all of the above.  
46  
47  
48  
49  
50  
51  
52  
53

54 Funding and acknowledgements: Work contributing to this manuscript was carried out as part  
55 of the University of Cambridge MPhil in Public Health degree (LMA and JNS, supervised by  
56 JWP); degrees were funded by the NHS East of England Multi-professional Deanery. There  
57 are no conflicts of interest to declare.  
58  
59  
60



## Article Summary

### Article focus

- Consumption of red and processed meat is a leading contributor to greenhouse gas emissions
- High intakes of red and processed meats increase the risks of several leading chronic diseases
- This research identifies a low red and processed meat dietary pattern that is already followed by a substantial fraction of the UK population and estimates health and environmental benefits that would result from its general adoption

### Key messages

- Habitual red and processed meat intakes are 2.5 times higher in the top compared with the bottom fifth of UK consumers
- Sustained dietary intakes at a counterfactual reduced level in the UK population would materially reduce incidence of coronary heart disease, diabetes mellitus and colorectal cancer, by 3-12%
- The predicted reduction in UK food and drink associated greenhouse gas emissions would equate to almost 28 million tonnes of CO<sub>2</sub> equivalent per year across the population

### Strengths and limitations of the study

- This research uses a food-based approach, taking intake-risk associations from meta-analyses rather than assuming the mechanisms via which the foods influence disease risk
- The dietary data was collected a decade ago, however the headline results from a more recent national dietary survey reveal that intakes of all meat categories were broadly similar although slightly higher in 2008/9 than in 2000/1

## Abstract

**Objectives** Consumption of red and processed meat (RPM) is a leading contributor to greenhouse gas (GHG) emissions and high intakes of these foods increase the risks of several leading chronic diseases. The aim was to use newly-derived estimates of habitual meat intakes in UK adults to assess potential co-benefits to health and the climate from reduced RPM consumption.

**Design** Modelling study using dietary intake data from the National Diet and Nutrition Survey of British Adults.

**Setting** British general population

**Methods** Respondents were divided into fifths by energy-adjusted RPM intakes, with vegetarians constituting a sixth stratum. GHG emitted in supplying the diets of each stratum were estimated using data from life cycle analyses. A feasible counterfactual UK population was specified, in which the proportion of vegetarians measured in the survey population doubled, and the remainder adopted the dietary pattern of the lowest fifth of RPM consumers.

**Outcome measures** Reductions in risks of coronary heart disease, diabetes and colorectal cancer and GHG emissions under the counterfactual.

**Results** Habitual RPM intakes were 2.5 times higher in the top compared with the bottom fifth of consumers. Under the counterfactual, statistically significant reductions in population aggregate risks ranged from 3.2% (95% CI 1.9, 4.7) for diabetes in females to 12.2% (6.4, 18.0) for colorectal cancer in males, with those moving from the highest to low consumption levels gaining about twice these averages. The expected reduction in GHG emissions was 0.45 tonnes CO<sub>2</sub>-equivalent/person/year, about 3% of the current total, giving a reduction across the UK population of 27.8 million tonnes/year.

**Conclusions** Reduced consumption of RPM would bring multiple benefits to health and the environment.

## Introduction

Climate change is ‘the biggest global health threat of the 21<sup>st</sup> century’<sup>1</sup> and appropriately chosen mitigation policies could ‘bring significant immediate co-benefits for population health and well-being’.<sup>2</sup>

Food and drink account for around one-third of total greenhouse gas (GHG) emissions attributable to UK consumers (when contributions from land use changes for agriculture are included). Around half of these emissions are ‘embedded’ in imports.<sup>3</sup> Livestock products are particularly GHG intensive, with the Food and Agriculture Organization attributing 18% of total global GHG emissions to these (when contributions from land use and land use change are included).<sup>4</sup> Although emissions can be reduced by changing production methods, savings achieved will not be sufficient to offset the effects of rising global demand, and radical departures from ‘business as usual’ trajectories will be needed to prevent global GHG emissions from livestock production rising unsustainably.<sup>5,6</sup> Even when food imports to the UK are ignored, failure to reduce domestic agricultural emissions will risk making the government’s 2050 target for an 80% reduction in total UK-based GHG emissions ‘unattainable’.<sup>7</sup> Considering only the final food products, the UK is approximately 50 to 90% self-sufficient in livestock production (see web appendix). However, total GHG emissions arising from the full life cycles of livestock food products are much bigger because of the overseas emissions associated with the large quantity of cereals and soy imported to feed animals raised in the UK.

Recent large meta-analyses<sup>8-10</sup> have found significant increases in risk of coronary heart disease, type 2 diabetes and colorectal cancer with increased intake of processed meat (increases of 42%, 19% and 18% respectively per 50g increase per day). A significant increase in colorectal cancer risk has also been shown with increased intake of red meat (17% per 100g increase per day).

Here we estimate co-benefits to health and climate change mitigation if, in the UK, high consumers of red and processed meat were to adopt the dietary patterns of current low consumers. We estimate GHG emissions reductions using published life-cycle analyses of different foods, and predict health benefits using published associations of red and processed meat intakes with incidence of coronary heart disease, diabetes mellitus and colorectal cancer from recent meta-analyses. Together, these diseases accounted for almost 12% of the total disease burden in the UK in 2004.<sup>11</sup>

## Methods

### *Dietary measurements*

Meat intakes have been estimated from the 2000/1 British National Diet and Nutrition Survey (NDNS), which collected 7 days of weighed dietary records from a sample of 1,724 respondents aged 19-64y.<sup>12</sup> As previous reports from this source had not separately identified the meat content of composite meat-containing dishes, we derived new estimates by systematically recoding the original records.<sup>13</sup> Meats were classified as (unprocessed) red, processed or white, and all foods were allocated to 1 of 45 food categories, designed to be relatively homogeneous in both their nutritional characteristics and in the GHG emissions arising from their supply (Table 1, which also includes the operational definitions of red, white and processed meat).

Intakes of each type of meat were adjusted for total energy intake (g/MJ). The NDNS sample was then split by sex, and stratified on the basis of average daily intakes of red plus processed meat (RPM). Self-declared vegetarians (2.3% of males, 6.2% of females) were allocated to their own stratum.<sup>14</sup> Remaining respondents were then ranked by average daily RPM intake and divided into fifths (F1 being lowest consumers, F5 highest). Mean RPM intakes for each of the resulting 6 sex-specific strata were standardised to the sex-specific mean energy intake in the total sample.

**[COMMENT TO REVIEWER: Although it is common practice to refer to fractions of the distribution lying between quintiles as ‘quintiles’ this is in our view technically incorrect, hence we maintain our use of ‘fifths’]**

Among non-vegetarians, marked within-person variability existed in daily intakes of RPM over the 7-day recording period. As a consequence, the differences between strata created on the basis of just 7 days of observation were substantially greater than the differences that would have resulted had it been possible to create strata using information on each individual’s usual (long-term average) intake. A method for correcting this inflation of between stratum differences has been described elsewhere.<sup>13</sup> In brief, sex-specific ratios of between- and within-person variances for energy-adjusted RPM intakes (g/MJ) were used to derive sex-specific correction factors according to the following equation:

$$\frac{S^2_{between}}{S^2_{between} + \frac{S^2_{within}}{7}}$$

These correction factors (0.622 in males and 0.542 in females) were used to ‘shrink’ the differences between each stratum’s initial estimated mean and the sex specific grand mean in

1 order to estimate expected mean *usual* intakes for each stratum – as though they had been  
2 created on the basis of usual intakes rather than intakes observed over just 7 days. For self-  
3 reported vegetarians, recorded intakes of RPM (which were not all null) were taken as the  
4 best estimates of usual intakes.  
5  
6  
7

8  
9 Mean energy-standardised intakes of all 45 food categories were then calculated for each  
10 stratum. Stratum F1 was taken to exemplify a ‘climate-friendly’ low RPM dietary pattern.  
11 Key food and nutrient intakes plus health, behavioural and socio-demographic variables  
12 across these strata are described elsewhere.<sup>13</sup>  
13  
14

#### 15 *Assignment of greenhouse gas emissions to food categories*

16 Emissions (given in table 1) are expressed as kg of CO<sub>2</sub>-equivalent (CO<sub>2</sub>-e) GHG resulting  
17 from all steps involved in making a given weight of food available for human consumption.  
18 Published values determined by life cycle analyses were identified and used to estimate  
19 average emissions for each of the 45 food categories.<sup>15,16</sup> Because emissions vary with system  
20 and country of production, weighted averages were calculated for meats according to  
21 proportions imported or produced in the UK under various systems. In the absence of data,  
22 processed meats were ascribed the values of equivalent unprocessed meats. Values for similar  
23 foods were interpolated where data was lacking. For the residual ‘miscellaneous’ category,  
24 the mean of all non-meat, non-beverage categories was applied (further details in Web  
25 Appendix).  
26  
27  
28  
29  
30  
31  
32  
33  
34

#### 35 *Specification of a counterfactual diet*

36 A ‘feasible alternative’<sup>17</sup> counterfactual distribution of diets was specified as one in which the  
37 proportions of vegetarians in each sex doubled and the remainder of the population adopted  
38 the average dietary pattern of F1. All else was assumed to remain equal. Calculations were  
39 based on data for persons aged 19-64y. Estimates for Britain in 2000/1 were assumed to be  
40 generalizable to the UK over the following decade to the present day.  
41  
42  
43  
44  
45

#### 46 *Changes in meat-related disease risks with the counterfactual intakes*

47 Risk relationships for red and processed meat intakes and coronary heart disease (CHD),  
48 diabetes mellitus and colorectal cancer were taken from published meta-analyses, described in  
49 Table 2.<sup>8-10</sup> The log of the relative risks was assumed to be linearly related to absolute intakes  
50 across the full range of exposures in the dataset, including the low (but not null) RPM intakes  
51 reported by self-declared vegetarians. Stratum-specific relative risks were used to estimate  
52 proportional changes in aggregated population risks. These ‘potential impact fractions’ (PIF)  
53 were estimated separately for each sex, using the following equation:<sup>18</sup>  
54  
55  
56  
57  
58  
59  
60

$$\text{PIF} = \frac{\text{current aggregate risk} - \text{aggregate risk under counterfactual}}{\text{current aggregate risk}}$$

$$= \frac{\sum p_{1i} RR_i - \sum p_{2i} RR_i}{\sum p_{1i} RR_i}$$

Where  $p$  refers to the proportion of the population in a given stratum;  $i$  identifies the stratum, and 1 and 2 identify the current and counterfactual intakes respectively. An overall PIF for each disease was calculated as the simple average of the values for males and females. Effects of reduced intakes of red and processed meat on colorectal cancer risk were assumed to be independent so that, for a given disease, the combined effect of both changes was estimated as:  $((1-\text{PIF}_1) \times (1-\text{PIF}_2))$ . This proportional change was then applied to WHO estimates for disease burdens in the UK for 2004 to give a population aggregate risk reduction for the UK.<sup>11</sup> Proportional risk reductions were also estimated for the hypothetical scenario of reducing RPM from the mean level for F5 to a sustained intake at the mean for F1.

#### *Estimation of GHG emissions*

Diet-attributable GHG emissions were estimated for each stratum by multiplying mean intakes of each of the 45 food categories by their average emission value (Table 1), and summing resulting values. Estimated habitual intakes were used for red and processed meats, however as the proportional changes to other food categories (after adjustment of meat intakes from measured to estimated habitual) were negligible (less than 3%), values derived from reported intakes were used for these. Resulting dietary emissions estimates were energy-adjusted using the mean energy intake in the stratum, and standardised to the mean sex-specific energy intake in the overall sample.

Diet-attributable GHG emissions under the counterfactual were calculated for each sex as weighted means of strata V and F1 (proportions in V doubling and F1 intake applied to all non-vegetarians). The overall value was calculated as the simple average of means for each sex. The difference between counterfactual and current emissions values gave the expected average reduction in emissions from the specified changes in measured dietary intakes at 19-64y. These were then adjusted for average energy requirements in the total population relative to the study sample (which was restricted to ages 19 to 64). This adjustment factor was estimated at 0.93.<sup>19</sup> Finally, the change in emissions based on measured intakes was rescaled to the level of the food supply supporting the measured intakes. This was based on the FAO Food Balance Sheet estimates, which give total meat available for consumption in Britain as 219 g/person/d, compared with the measured intakes of 104 g/person/d. This ratio for meats was used as an estimate for inflation of total dietary GHG emissions, although it is

1  
2  
3  
4  
5  
6  
7  
8  
9  
10  
11  
12  
13  
14  
15  
16  
17  
18  
19  
20  
21  
22  
23  
24  
25  
26  
27  
28  
29  
30  
31  
32  
33  
34  
35  
36  
37  
38  
39  
40  
41  
42  
43  
44  
45  
46  
47  
48  
49  
50  
51  
52  
53  
54  
55  
56  
57  
58  
59  
60

accepted that wastage varies between food groups. No attempt was made to model the effects of reducing waste.

## Results

RPM intakes show marked heterogeneity across the British population, with habitual intakes around 2.5 times higher in the top (F5) than in the bottom (F1) fifth of non-vegetarians. Under our counterfactual, 4.7% of males and 12.3% of females were vegetarian and the remainder adopted the sex-specific dietary pattern of F1. Average RPM intakes were reduced from 91 to 53 g/d in males and from 54 to 30 g/d in females (42% and 44% reductions respectively), as shown in Figure 1.

### *Changes in disease risks*

Assuming epidemiologically observed risk associations are causal and independent, statistically significant risk reductions for the 3 diseases of interest would range from 3.2 to 12.2% under the counterfactual scenario (see Table 3). Benefits would be greatest in those with the highest current intakes (F5; see Table 4).

### *Changes in greenhouse gas emissions*

Total daily GHG emissions attributable to measured dietary intakes were estimated at 4.58 kg CO<sub>2</sub>-e in males and 3.34 kg CO<sub>2</sub>-e in females (unweighted mean 3.96 kg CO<sub>2</sub>-e). The sex difference disappeared when emissions were expressed per MJ of dietary energy (0.47 kg CO<sub>2</sub>-e/MJ in males, 0.49 kg CO<sub>2</sub>-e/MJ in females). Red meat intake accounted for 31% of dietary CO<sub>2</sub>-e emissions in males and 27% in females, with processed meat accounting for an additional 10% and 8% in males and females respectively.

CO<sub>2</sub>-e emissions attributable to diet are shown for each stratum in Figure 2. Emissions for males increased by one third from F1 to F5 and for females by one quarter. Emissions attributable to dietary constituents other than red and processed meat were relatively constant across strata.

Diet-related emissions, calculated on the basis of intakes, were reduced by 0.47 kg CO<sub>2</sub>-e/person/d (or 12%) to 3.96 kg CO<sub>2</sub>-e/person/d in males and 3.02 kg CO<sub>2</sub>-e/person/d in females. Scaling this estimate up to the food supplies supporting these intakes increases the expected reduction to 1.23 kg CO<sub>2</sub>-e/person/d or 0.45 tonnes/person/y. For the 2009 UK population of 61,792,000 this amounts to a total GHG reduction of 27.8 m tonnes/y.

## Discussion

We have identified a low red and processed meat dietary pattern that is already followed by a substantial fraction of the UK population, and estimated the health and environmental benefits that would result from its general adoption. Although the dietary intake data used here was collected a decade ago, the headline results from a more recent NDNS (fieldwork carried out 2008/9) reveal that intakes of all meat categories were broadly similar although slightly higher than in 2000/1.<sup>20</sup> This indicates that our estimates remain relevant and may even be conservative, and highlights the need for action to prevent further increases in intake in the UK population.

We estimate that sustained dietary intakes at our counterfactual levels would materially reduce incidence of coronary heart disease, diabetes mellitus and colorectal cancer. Our method for calculating changes in population aggregate risks could not allow for confounding on the outcome.<sup>21</sup> Our point estimates for these reductions have associated uncertainties, which we have estimated using Monte Carlo simulation, although the relative risk estimates may still be more uncertain than we have assumed. Our estimates have been based on meta-analyses of a limited number of reports of the association between intakes of different types of meat and the chronic diseases of interest, and are therefore highly dependent on these results. A more recent meta-analysis indicates that our results may be conservative for diabetes.<sup>22</sup> This research, including over 440,000 individuals, found a similar but statistically significant increase in risk of type 2 diabetes with unprocessed red meat intake (RR 1.19 (95% CI 1.04 – 1.37) per 100g unprocessed red meat per day) but a far stronger association with processed meat than that used here (RR 1.51 (95% CI 1.25 – 1.83) per 50g processed meat per day). A recent update of the WCRF/AICR meta-analysis does not change the relative risk estimates given in that report and used in our analyses.<sup>23</sup>

Using meta-analyses of the association between intakes of different types of meat and the risks of vascular disease and diabetes, we have avoided simply regarding meat as a vehicle for dietary fats and assuming all associated risks to be mediated via effects on blood lipids.<sup>24</sup> This food-based approach to assessing the health effects of meat is supported by the failure of epidemiological studies to confirm expected associations between intakes of unprocessed red meat and risk of coronary heart disease, by the differing patterns of epidemiological association with unprocessed and processed red meat, and by the evidence that red and processed meat intakes are associated with other vascular risk factors, notably blood pressure.<sup>25,26</sup> Whilst we have only considered a limited range of diseases here, the incidence of stroke and a wider range of cancers could also be expected to decline.<sup>27</sup>



1 Using 2004 Global Burden of Disease estimates for the UK,<sup>11</sup> the reduction in health losses  
2 under the counterfactual would be 50,960 disability-adjusted life years (DALYs) per year for  
3 ischaemic heart disease, 5,421 DALYs per year for diabetes and 13,761 DALYs per year for  
4 colorectal cancer. If effects on these diseases were independent of each other, total reduction  
5 in DALYs would be 70,142/y, equivalent to almost 1% of health losses from all causes in the  
6 UK in 2004. These calculations are based on the assumptions that effects on incidence-based  
7 disease burdens are proportional to effects on incidence, and that the results based on the diets  
8 of 19-64 year olds are applicable to the over-65 population, where the majority of the disease  
9 burden lies.

10 The predicted reduction in GHG emissions would equate to a total saving in UK food and  
11 drink associated emissions of 27.8 million tonnes CO<sub>2</sub>-e/y across the 2009 UK population. To  
12 put this into context, the UK GHG 'footprint' has been estimated (using production-based  
13 accounts) at 10.16 tonnes CO<sub>2</sub>-e/person/y.<sup>28,29</sup> Total emissions attributable to UK consumers  
14 will exceed this by perhaps 30 to 40% due to large net imports of embedded GHG.<sup>30</sup> This  
15 implies that *consumption*-based emissions are over 14 tonnes CO<sub>2</sub>-e/person/y. Emissions  
16 reductions under the counterfactual therefore represent a saving of over 3% of this figure, a  
17 worthwhile amount given that climate change mitigation is going to require contributions  
18 from diverse sources.

19 Recent work for the UK Committee on Climate Change (CCC) has modelled the reductions in  
20 GHG emissions both in the UK and overseas resulting from three specified dietary change  
21 scenarios.<sup>7,31</sup> Under a scenario in which UK intake of livestock products was reduced by 50%  
22 (with a two-thirds reduction in all meat and the deficit replaced with plant-based foods), the  
23 reduction in GHG emissions was estimated to be 15.0 million tonnes CO<sub>2</sub>-e/y. In a second  
24 scenario, beef and sheep meat were replaced with pig and poultry, with no overall reduction in  
25 total meat intake, resulting in a reduction in GHG emissions of 6.3 million tonnes CO<sub>2</sub>-e/y.  
26 The dietary changes in the CCC scenarios were more extreme than the counterfactual dietary  
27 pattern taken here, with either a greater total reduction in meat, or total elimination of beef  
28 and sheep meat. However, the GHG reductions estimated in this work were greater due to  
29 inflation to account for wasted food. Whilst we made no attempt to model the impact of a  
30 reduction in waste, this demonstrates the great potential to make GHG savings even without  
31 major dietary changes through reducing waste. This approach however would not bring co-  
32 benefits to health.

33 We found that around one-quarter of the UK population had habitual intakes of red and  
34 processed meat below 55 g/d and 27g/d for men and women respectively, representing around  
35 two-thirds (62%) and one-half (51%) of their sex-specific means. Examination of the rest of

1 the diet revealed that some, but far from all, of this reduction was offset by increased white  
2 meat intake, and remaining dietary substitution for RPM came from a wide variety of other  
3 sources.<sup>10</sup> We have not considered beneficial effects from compensatory increases in other  
4 dietary components, especially fruit and vegetables and dietary fibre. Other assessments of the  
5 health effects of broadly similar dietary changes have found these beneficial effects to be of  
6 even greater magnitude than the reductions in harms.<sup>24</sup> Recent estimation of the health effects  
7 of the CCC dietary scenarios has found that the greatest health gains were achieved when  
8 meat was replaced by fruits and vegetables.<sup>32</sup> The influence of increases in these foods was  
9 far greater than health benefits attributable to reductions in salt consumption or changes in the  
10 fatty acid profile of the diets. When considering both the health and environmental effects of  
11 reducing RPM consumption therefore, substitute foods are important, and clear advice should  
12 be given regarding these in order that benefits are maximised.

13 Intakes of RPM are socially patterned, especially in females. Forty-five percent of low (F1)  
14 but only 29% of high (F5) RPM strata for females, were in social class I or II and 41% versus  
15 19% had formal education beyond A level.<sup>12</sup> Although mainly outside the scope of this paper  
16 it may also be noted that inequalities in health outcomes are produced by inequalities in health  
17 determinants, so a downward convergence of RPM intakes would be expected to yield a third  
18 benefit: a reduction in health inequalities. This is illustrated by the large potential risk  
19 reductions available to high consumers were they to converge down to the intakes of the low  
20 consumers.

21 Climate change mitigation is a far-future benefit that may not directly affect those who must  
22 make lifestyle changes now. It is therefore unlikely to be a strong motivator for change. In  
23 contrast, health benefits provide near-term rewards to individuals for climate-friendly  
24 changes, and may thus 'nudge' humanity towards a sustainable future. Dietary  
25 recommendations should no longer be based on direct health effects alone. Whilst the UK  
26 Government has acknowledged the environmental impact of livestock production and is  
27 taking action with the industry to improve efficiency,<sup>33</sup> changes in production will be  
28 insufficient alone to meet challenging emission reduction targets. Joint producer and  
29 consumer responsibility is needed, supported by the use of both production- and  
30 consumption-based GHG accounts. Averting dangerous climate change will require multiple  
31 changes at all levels of society, and the potential contribution of reduced red and processed  
32 meat consumption should be addressed.

## References

- 1 Costello A, Abbas M, Allen A, et al. Managing the health effects of climate change: Lancet and University College London Institute for Global Health Commission. Lancet. 2009; 373(9676):1693-733.
- 2 Garnett T. Cooking up a storm: Food, greenhouse gas emissions and our changing climate. Guildford: Food Climate Research Network; 2008.
- 3 Audsley E, Brander M, Chatterton J, et al. How low can we go? An assessment of greenhouse gas emissions from the UK food system and the scope for reduction by 2050. Godalming: WWF-UK; 2010.
- 4 Food and Agriculture Organisation. Livestock's Long Shadow: Environmental Issues and Options. Rome: FAO; 2006.
- 5 McMichael AJ, Powles JW, Butler CD, et al. Energy and health 5 - Food, livestock production, energy, climate change, and health. Lancet. 2007; 370(9594):1253-63.
- 6 Erb K-H, Haberl H, Krausmann K, et al. Eating the Planet: Feeding and fuelling the world sustainably, fairly and humanely - a scoping study. Commissioned by Compassion in World Farming and Friends of the Earth UK. Vienna: Institute of Social Ecology; 2009.
- 7 Committee on Climate Change. The fourth carbon budget: reducing emissions through the 2020s [online] Available at <http://www.theccc.org.uk/reports/fourth-carbon-budget> [Accessed 28 June 2011]. London: Committee on Climate Change; 2010.
- 8 WCRF/AICR. Food, Nutrition, Physical Activity and the Prevention of Cancer: a Global Perspective. Washington DC: AICR; 2007.
- 9 Norat T, Chan D, Lau R, et al. The associations between food, nutrition and physical activity and the risk of colorectal cancer: WCRF/AICR Systematic Literature Review Continuous Update Project Report. Imperial College London: WCRF/AICR; 2010.
- 10 Micha R, Wallace S, Mozaffarian D. Red and processed meat consumption and risk of incident coronary heart disease, stroke, and diabetes mellitus: a systematic review and meta-analysis. Circulation. 2010; v121(21):2271-83.
- 11 WHO Global Health Observatory Data Repository. Death and DALY estimates for 2004 by cause for WHO member states [online] Available at <http://apps.who.int/ghodata/?vid=10011> [Accessed 20 September 2011]. Geneva: WHO; 2009.

- 1  
2  
3  
4  
5  
6  
7  
8  
9  
10  
11  
12  
13  
14  
15  
16  
17  
18  
19  
20  
21  
22  
23  
24  
25  
26  
27  
28  
29  
30  
31  
32  
33  
34  
35  
36  
37  
38  
39  
40  
41  
42  
43  
44  
45  
46  
47  
48  
49  
50  
51  
52  
53  
54  
55  
56  
57  
58  
59  
60
- 12 Office for National Statistics. National Diet and Nutrition Survey: Adults aged 19 to 64 years, 2000-2001 [computer file] SN: 5140. Colchester, Essex: UK Data Archive [distributor]; 2005.
- 13 Aston LM, Smith JN, Powles JW. Meat intake in Britain in relation to other dietary components and to demographic and risk factor variables: analyses based on the National Diet and Nutrition Survey of 2000/2001. *Journal of Human Nutrition and Dietetics*. 2012; in press.
- 14 Henderson L, Gregory J, Swann G. The National Diet and Nutrition Survey: adults aged 19 to 64 years. Volume 1: Types and quantities of foods consumed. Norwich: HMSO; 2002.
- 15 Department for Environment Food and Rural Affairs. Scenario building to test and inform the development of a BSI method for assessing GHG emissions from food. Research project final report FO0404. London: DEFRA; 2009.
- 16 Wallen A, Brandt N, Wennersten R. Does the Swedish consumer's choice of food influence greenhouse gas emissions? *Environmental Science and Policy*. 2004; 7:525-35.
- 17 Murray CJL, Lopez AD On the comparable quantification of health risks: lessons from the Global Burden of Disease study. *Epidemiology*. 1999; 10:594-605
- 18 Ezzati M, Lopez AD, Rodgers A, et al. Selected major risk factors and global and regional burden of disease. *Lancet*. 2002; 360(9343):1347-60.
- 19 Schofield WN Predicting basal metabolic rate, new standards and review of previous work. *Human Nutrition Clinical Nutrition*. 1985; 39(S1):5-41.
- 20 Food Standards Agency. Tables – NDNS Headline results from Year 1 of the Rolling Programme (2008/9) [online] Available at <http://www.food.gov.uk/science/dietarysurveys/ndnsdocuments/ndns0809year1> [Accessed 15 July 2010] FSA; 2010.
- 21 Rockhill B, Newman B, Weinberg C. Use and misuse of population attributable fractions. *American Journal of Public Health*. 1998; 88(1):15-9.
- 22 Pan A, Sun Q, Bernstein AM, et al. Red meat consumption and risk of type 2 diabetes: 3 cohorts of US adults and an updates meta-analysis. *American Journal of Clinical Nutrition*. 2011;94(4):1088-96.

- 1  
2  
3  
4  
5  
6  
7  
8  
9  
10  
11  
12  
13  
14  
15  
16  
17  
18  
19  
20  
21  
22  
23  
24  
25  
26  
27  
28  
29  
30  
31  
32  
33  
34  
35  
36  
37  
38  
39  
40  
41  
42  
43  
44  
45  
46  
47  
48  
49  
50  
51  
52  
53  
54  
55  
56  
57  
58  
59  
60
- 23 Chan DS, Lau R, Aune D, et al. Red and processed meat and colorectal cancer incidence: meta-analysis of prospective studies. *PLoS One* 2011; 6(6):e20456..
- 24 Scarborough P, Noaham KE, Clarke D, et al. Modelling the impact of a healthy diet on cardiovascular disease and cancer mortality. *Journal of Epidemiology and Community Health*. 2010; epub doi:10.1136/jech.2010.114520.
- 25 Miura K, Greenland P, Stamler J, et al. Relation of Vegetable, Fruit, and Meat Intake to 7-Year Blood Pressure Change in Middle-aged Men: The Chicago Western Electric Study. *American Journal of Epidemiology*. 2004; 159(6):572-80.
- 26 Steffen LM, Kroenke CH, Yu X, et al. Associations of plant food, dairy product, and meat intakes with 15-y incidence of elevated blood pressure in young black and white adults: the Coronary Artery Risk Development in Young Adults (CARDIA) Study. *American Journal of Clinical Nutrition*. 2005; 82(6):1169-77.
- 27 Friel S, Dangour AD, Garnett T, et al. Public health benefits of strategies to reduce greenhouse-gas emissions: food and agriculture. *Lancet*. 2009; 374:2016-25.
- 28 Department for Environment Food and Rural Affairs. The environment in your pocket. Norwich: The Stationery Office; 2009.
- 29 Office for National Statistics. Population estimates. <http://www.statistics.gov.uk/cci/nugget.asp?id=6>; ONS; 2010.
- 30 Davis S, Caldeira K. Consumption-based accounting of CO<sub>2</sub> emissions. *PNAS*. 2010; 107(12):5687-92.
- 31 Cranfield University. The effect of changes in UK food consumption patterns on land requirements and greenhouse gas emissions; 2010.
- 32 Scarborough P, Allender S, Clarke D, et al. Modelling the health impact of environmentally sustainable dietary scenarios in the UK. *European Journal of Clinical Nutrition*. 2012; 66:710-715.
- 33 EBLEX. Change in the air: The English beef and sheep production roadmap. Kenilworth: EBLEX; 2009.

**Table 1:** Greenhouse gas emissions, expressed as CO<sub>2</sub>-equivalents/kg food produced for consumption in the UK\*

| Food Category                        | GHG emissions (kg CO <sub>2</sub> -e/kg) | Inclusions/Notes            | Source                     |
|--------------------------------------|------------------------------------------|-----------------------------|----------------------------|
| <b>Unprocessed Meat</b>              |                                          |                             |                            |
| 1 Beef                               | 30.00                                    |                             | DEFRA <sup>15</sup>        |
| 2 Lamb                               | 50.00                                    |                             | DEFRA <sup>15</sup>        |
| 3 Pork                               | 10.00                                    |                             | DEFRA <sup>15</sup>        |
| 4 Other red meat <sup>i</sup>        | 30.00                                    | Venison, Goat               | Mean beef/pork/lamb        |
| 5 White meat <sup>ii</sup>           | 4.00                                     | Chicken, turkey, game birds | DEFRA <sup>15</sup>        |
| 6 Other birds                        | 5.32                                     | Duck, goose                 | DEFRA <sup>15</sup>        |
| <b>Processed Meat <sup>iii</sup></b> |                                          |                             |                            |
| 7 Processed beef                     | 30.00                                    |                             | = beef                     |
| 8 Processed pork                     | 10.00                                    | Sausagemeat, bacon, ham     | = pork                     |
| 9 Processed white meat               | 4.00                                     |                             | = white meat               |
| <b>Fish</b>                          |                                          |                             |                            |
| 10 Fresh fish/shellfish              | 2.60                                     |                             | Wallen et al <sup>16</sup> |
| 11 Frozen fish                       | 6.50                                     |                             | Wallen et al <sup>16</sup> |
| <b>Dairy/Eggs</b>                    |                                          |                             |                            |
| 12 Milk                              | 1.30                                     | Yoghurt, cream, custard     | DEFRA <sup>15</sup>        |
| 13 Cheese                            | 9.80                                     |                             | Wallen et al <sup>16</sup> |
| 14 Ice cream                         | 0.64                                     |                             | Wallen et al <sup>16</sup> |
| 15 Egg                               | 3.00                                     |                             | DEFRA <sup>15</sup>        |
| <b>Starchy Staples</b>               |                                          |                             |                            |
| 16 Bread                             | 0.73                                     |                             | DEFRA <sup>15</sup>        |
| 17 Breakfast cereal                  | 1.00                                     |                             | Wallen et al <sup>16</sup> |
| 18 Pasta                             | 0.81                                     |                             | Wallen et al <sup>16</sup> |
| 19 Rice                              | 1.68                                     |                             | Wallen et al <sup>16</sup> |
| 20 Unprocessed potato                | 0.16                                     |                             | DEFRA <sup>15</sup>        |
| 21 Frozen potato                     | 0.57                                     |                             | Wallen et al <sup>16</sup> |
| 22 Other potato products             | 2.37                                     |                             | Wallen et al <sup>16</sup> |
| 23 Flour/other grains                | 1.00                                     |                             | Wallen et al <sup>16</sup> |
| <b>Fruit &amp; Vegetables</b>        |                                          |                             |                            |
| 24 Vegetables (1)                    | 0.50                                     | Roots, onions, brassicas    | Wallen et al <sup>16</sup> |
| 25 Vegetables (2)                    | 3.30                                     | All other, including salad  | Wallen et al <sup>16</sup> |
| 26 Pulses                            | 0.64                                     | Dried/tinned                | Wallen et al <sup>16</sup> |
| 27 Tomato <sup>g</sup>               | 2.00                                     | Including tinned            | DEFRA <sup>15</sup>        |
| 28 Fruit                             | 0.40                                     | All                         | Wallen et al <sup>16</sup> |
| <b>Fats</b>                          |                                          |                             |                            |
| 29 Butter                            | 0.98                                     |                             | Wallen et al <sup>16</sup> |
| 30 Margarine                         | 2.12                                     |                             | Wallen et al <sup>16</sup> |
| 31 Cooking oil                       | 3.53                                     |                             | Wallen et al <sup>16</sup> |
| <b>Other</b>                         |                                          |                             |                            |
| 32 Crispbread/biscuits               | 2.65                                     |                             | Wallen et al <sup>16</sup> |
| 33 Buns/cakes                        | 0.91                                     |                             | Wallen et al <sup>16</sup> |
| 34 Chocolate/sweets                  | 1.80                                     |                             | Wallen et al <sup>16</sup> |
| 35 Sugar/honey/treacle               | 4.18                                     |                             | Wallen et al <sup>16</sup> |
| 36 Jam/marmalade                     | 0.81                                     | Including chutneys          | Wallen et al <sup>16</sup> |
| <b>Beverages</b>                     |                                          |                             |                            |
| 37 Soft beverages                    | 0.56                                     |                             | Wallen et al <sup>16</sup> |
| 38 Mineral water                     | 0.56                                     |                             | = soft beverages           |
| 39 Alcoholic beverages               | 0.56                                     |                             | = soft beverages           |
| 40 Fruit juice/syrup                 | 0.99                                     | Including cordials          | Wallen et al <sup>16</sup> |
| 41 Coffee                            | 33.00                                    |                             | DEFRA <sup>15</sup>        |
| 42 Tea                               | 4.10                                     | Including herbal tea        | DEFRA <sup>15</sup>        |
| 43 Cocoa                             | 210.00                                   | Including hot chocolate     | DEFRA <sup>15</sup>        |
| 44 Tap water                         | 0.00                                     | Including that in foods     | No data                    |
| 45 <b>Miscellaneous</b>              | 1.85                                     | All other                   | Mean of all                |

1  
2 \* Emission estimates are preferentially based on life cycle analyses. Where emissions vary by production  
3 system within and beyond the UK, values are averages weighted on contributions to the UK food supply.

4 Further details in Web Appendix: Assumptions and methods used in the derivation of greenhouse gas  
5 emissions from food produced for UK consumers.  
6

7 The following definitions were used, consistent those used in the meta-analyses of intake-risk associations:

8 <sup>i</sup> **Red meat** as beef, veal, pork, lamb, mutton and goat, either fresh, minced (including hamburgers) or  
9 frozen, but unprocessed other than by cooking with heat. Although processed meats were primarily red  
10 meats, the term 'red meat' has been used in this report to refer to 'unprocessed red meat', unless otherwise  
11 specified.

12 <sup>ii</sup> **White meat** as meat from poultry, fresh, minced or frozen, but unprocessed other than by cooking with  
13 heat.

14 <sup>iii</sup> **Processed meat** as meat preserved by smoking, curing, salting or addition of nitrates, nitrites or other  
15 preservatives. Under this definition, processed meats were primarily red, but included white meats, and  
16 included ham, bacon, pastrami, salami, sausages and processed deli or luncheon meats.  
17  
18  
19  
20  
21  
22  
23  
24  
25  
26  
27  
28  
29  
30  
31  
32  
33  
34  
35  
36  
37  
38  
39  
40  
41  
42  
43  
44  
45  
46  
47  
48  
49  
50  
51  
52  
53  
54  
55  
56  
57  
58  
59  
60

**Table 2:** Relative risks of incident coronary heart disease, diabetes mellitus and colorectal cancer for differences of 100 g/d usual intakes of red and 50 g/d of usual intakes of processed meat from two meta-analyses

| Exposure                           | Disease                | Relative Risk (95% CI) | Meta-analysis             | Comments                                                                                                                                                                                                                                                                                                                                      |
|------------------------------------|------------------------|------------------------|---------------------------|-----------------------------------------------------------------------------------------------------------------------------------------------------------------------------------------------------------------------------------------------------------------------------------------------------------------------------------------------|
| Red meat*<br>(RR per 100 g/d)      | Coronary heart disease | 1.00 (0.81, 1.23)      | Micha et al <sup>10</sup> | Based on 4 estimates; most controlled for total energy intake. No between-study heterogeneity or publication bias was evident. The range of exposures across all included studies (means in lowest/highest categories) was 15.7–118.6 g/d.                                                                                                    |
|                                    | Diabetes mellitus      | 1.16 (0.92, 1.46)      | Micha et al <sup>10</sup> | Based on 5 estimates; most controlled for total energy intake. No between-study heterogeneity or publication bias was evident. The range of exposures across all included studies (means in lowest/highest categories) was 15.7–118.6 g/d.                                                                                                    |
|                                    | Colorectal cancer      | 1.17 (1.05, 1.31)      | WCRF/AICR <sup>9</sup>    | Based on 8 cohort studies; most controlled for total energy intake. There was no evidence of heterogeneity was present and a random-effects model was used. There were insufficient studies to check for publication bias. Intakes per category spanned the range 1 – >200g/d.                                                                |
| Processed meat*<br>(RR per 50 g/d) | Coronary heart disease | 1.42 (1.07, 1.89)      | Micha et al <sup>10</sup> | Based on 6 estimates; most controlled for total energy intake. Between-study heterogeneity and publication bias were evident; sensitivity analysis did not significantly change the outcome, and a random-effects model was used. The range of exposures across all included studies (means in lowest/highest categories) was 2.9 – 40.7 g/d. |
|                                    | Diabetes mellitus      | 1.19 (1.11, 1.27)      | Micha et al <sup>10</sup> | Based on 6 estimates; most controlled for total dietary energy. Some heterogeneity was evident, but publication bias was not; sensitivity analysis did not significantly change the outcome, and a random-effects model was used. The range of exposures across all studies (means in lowest/highest categories) was 2.9 – 40.7 g/d.          |
|                                    | Colorectal cancer      | 1.18 (1.10, 1.28)      | WCRF/AICR <sup>9</sup>    | Based on 9 cohort studies; most controlled for total energy intake. Low heterogeneity was present and a random-effects model was used. Publication bias was not evident. Intakes per category spanned the range 1 – >100 g/d.                                                                                                                 |

\* For definitions see text



**Table 3:** Predicted reductions (%) in population risks of coronary heart disease, diabetes and colorectal cancer from sustained exposure at counterfactual intakes of red and processed meat and both (assuming independence of effects)

|                               | Red meat          |               | Processed meat |               | Red plus processed meat |               |
|-------------------------------|-------------------|---------------|----------------|---------------|-------------------------|---------------|
|                               | % risk change     | (95% UI*)     | % risk change  | (95% UI*)     | % risk change           | (95% UI*)     |
| <b>Coronary heart disease</b> |                   |               |                |               |                         |               |
| Males                         | 0.0 <sup>†</sup>  | (-10.4, 11.0) | -9.7           | (-1.8, -18.1) | -9.7 <sup>†</sup>       | (3.6, -22.0)  |
| Females                       | 0.0 <sup>†</sup>  | (6.4, -6.2)   | -6.4           | (-1.2, -11.9) | -6.4 <sup>†</sup>       | (1.8, -14.3)  |
| <b>Diabetes mellitus</b>      |                   |               |                |               |                         |               |
| Males                         | -7.5 <sup>†</sup> | (4.2, -18.6)  | -4.9           | (-2.8, -7.3)  | -12.0 <sup>†</sup>      | (4.5, -22.7)  |
| Females                       | -4.5 <sup>†</sup> | (2.5, -11.5)  | -3.2           | (-1.9, -4.7)  | -7.5                    | (-0.5, -14.5) |
| <b>Colorectal cancer</b>      |                   |               |                |               |                         |               |
| Males                         | -7.9              | (-2.4, -13.5) | -4.6           | (-2.4, -7.2)  | -12.2                   | (-6.4, -18.0) |
| Females                       | -4.8              | (-1.4, -8.3)  | -3.0           | (-1.6, -4.7)  | -7.7                    | (-4.0, -11.3) |

\* Uncertainty intervals estimated by Monte Carlo simulation, using @Risk software (Palisade, New York)

<sup>†</sup> Non-significant

**Table 4:** Predicted reductions (%) in risks of coronary heart disease, diabetes and colorectal cancer for persons with usual intakes at the mean levels for F5 had they had sustained exposure at usual intakes for F1 of red and processed meat and both (assuming independence of effects)

|                               | Red meat           |               | Processed meat |               | Red plus processed meat |                |
|-------------------------------|--------------------|---------------|----------------|---------------|-------------------------|----------------|
|                               | % risk change      | (95% UI*)     | % risk change  | (95% UI*)     | % risk change           | (95% UI*)      |
| <b>Coronary heart disease</b> |                    |               |                |               |                         |                |
| Males                         | 0.0 <sup>†</sup>   | (25.7, -20.4) | -20.6          | (-4.2, -35.1) | -20.6 <sup>†</sup>      | (1.3, -37.0)   |
| Females                       | 0.0 <sup>†</sup>   | (17.6, -14.7) | -11.0          | (-2.2, -20.0) | -11.1 <sup>†</sup>      | (7.7, -26.7)   |
| <b>Diabetes mellitus</b>      |                    |               |                |               |                         |                |
| Males                         | -14.9 <sup>†</sup> | (9.2, -33.8)  | -10.5          | (-6.4, -15.7) | -24.1 <sup>†</sup>      | (1.6, -41.7)   |
| Females                       | -10.8 <sup>†</sup> | (6.6, -25.6)  | -5.7           | (-3.3, -8.4)  | -15.9 <sup>†</sup>      | (0.9, -30.0)   |
| <b>Colorectal cancer</b>      |                    |               |                |               |                         |                |
| Males                         | -15.7              | (-4.9, -25.6) | -10.3          | (-5.5, -15.5) | -24.4                   | (-13.6, -34.1) |
| Females                       | -11.4              | (-3.4, -19.0) | -6.4           | (-2.8, -8.4)  | -16.2                   | (-8.4, -23.7)  |

\* Uncertainty intervals estimated by Monte Carlo simulation, using @Risk software (Palisade, New York)

<sup>†</sup> Non-significant

## Web Appendix: Assumptions and methods used to estimate greenhouse gas emissions from producing foods for UK consumers

### Beef

Values for beef varied 4-fold according to the production system, with the value for Brazilian beef reflecting transport emissions. Values from DEFRA<sup>i</sup> were as follows:

|                      |                                          |
|----------------------|------------------------------------------|
| UK Intensive Dairy   | 10 kg CO <sub>2</sub> -e/kg hung carcass |
| UK Extensive Suckler | 30 kg CO <sub>2</sub> -e/kg hung carcass |
| UK Organic Suckler   | 32 kg CO <sub>2</sub> -e/kg hung carcass |
| Brazil Suckler       | 40 kg CO <sub>2</sub> -e/kg hung carcass |

The UK has 80% self sufficiency in beef production,<sup>ii</sup> with equal quantities of UK beef coming from dairy and suckler herds.<sup>iii,iv</sup> Consumption of organic beef is negligible, at around 1%.<sup>v</sup> This was therefore ignored, particularly since emissions were similar to those for suckler cattle. 65% of beef imports to the UK come from Ireland and other EU countries, which were assumed to have the UK average value of 20 kg CO<sub>2</sub>-e/kg hung carcass. A further 21% of UK beef comes from South America, for which the Brazil value was assumed, and the final 14% from 'other' countries, for which the average of UK and Brazilian beef was assumed (30 kg CO<sub>2</sub>-e/kg hung carcass). 1 kg of hung carcass produces 0.7 kg bone-free meat.<sup>vi</sup> According to this information, a weighted average CO<sub>2</sub>-e value was calculated to be 30 kg CO<sub>2</sub>-e/kg, using the following equation:

$$((0.40 \times 10) + (0.40 \times 30) + (0.13 \times 20) + (0.042 \times 40) + (0.028 \times 30)) / 0.7 = 30 \text{ kg CO}_2\text{-e/kg}$$

### Lamb

Values for UK-consumed lamb were obtained from DEFRA,<sup>i</sup> as follows:

|                      |                                          |
|----------------------|------------------------------------------|
| UK Intensive Lowland | 28 kg CO <sub>2</sub> -e/kg hung carcass |
| UK Extensive Upland  | 39 kg CO <sub>2</sub> -e/kg hung carcass |
| UK Organic Lowland   | 27 kg CO <sub>2</sub> -e/kg hung carcass |
| New Zealand          | 33 kg CO <sub>2</sub> -e/kg hung carcass |

The UK is 85% self-sufficient in lamb production,<sup>iv</sup> with around 70% of this being upland lamb and the remaining 30% lowland.<sup>iii</sup> As for beef, organic was assumed to be negligible. 90% of UK imports originate from New Zealand, Australia or South America, for which the New Zealand value was assumed. The remaining 10% originate from Ireland or other EU countries, for which the UK average of 36 kg CO<sub>2</sub>-e/kg was assumed. 1 kg of hung carcass produces 0.7 kg bone-free meat (personal communication with EBLEX). A weighted average value for lamb was therefore calculated to be 50 kg CO<sub>2</sub>-e/kg:

$$((0.60 \times 39) + (0.25 \times 28) + (0.135 \times 33) + (0.015 \times 36)) / 0.7 = 50 \text{ kg CO}_2\text{-e/kg}$$

## Pork

GHG emissions from pork produced under different systems were obtained from DEFRA:<sup>i</sup>

|                      |                                           |
|----------------------|-------------------------------------------|
| UK Intensive Indoor  | 5.5 kg CO <sub>2</sub> -e/kg hung carcass |
| UK Extensive Outdoor | 8.9 kg CO <sub>2</sub> -e/kg hung carcass |
| UK Organic Outdoor   | 9.9 kg CO <sub>2</sub> -e/kg hung carcass |

The UK is 47% self-sufficient in pork production, with 70% being indoor reared.<sup>vii</sup> As above, organic production was assumed as negligible. Imports to the UK come entirely from the EU. This production was assumed to be intensive and the figure for UK intensive production was adopted and rounded to 6 to allow a small amount for road transport. 1 kg hung pork carcass produces 0.6 kg bone-free meat.<sup>vi</sup> A weighted average for pork was calculated as 10 kg CO<sub>2</sub>-e/kg:  $((0.33 \times 5.5) + (0.14 \times 8.9) + (0.53 \times 6)) / 0.6 = 10 \text{ kg CO}_2\text{-e/kg}$

## Chicken

Values for chicken were obtained from DEFRA:<sup>i</sup>

|                      |                                           |
|----------------------|-------------------------------------------|
| UK Intensive Indoor  | 3.1 kg CO <sub>2</sub> -e/kg hung carcass |
| UK Extensive Outdoor | 3.7 kg CO <sub>2</sub> -e/kg hung carcass |
| UK Organic Outdoor   | 4.1 kg CO <sub>2</sub> -e/kg hung carcass |

The UK is 90% self sufficient in chicken production, with 20% being outdoor or organically reared.<sup>viii</sup> As the value for organic production was close to that for outdoor, the value for outdoor was used for both. Imports to the UK are mainly from the EU, Brazil and Thailand, with much being shipped frozen from the non-EU countries. The UK intensive value was rounded to 3.5 to reflect road and ship transport. 1 kg hung carcass produces 0.77 kg bone-free meat.<sup>vi</sup> A weighted average was calculated as 4 kg CO<sub>2</sub>-e/kg:

$$((0.72 \times 3.1) + (0.18 \times 3.7) + (0.10 \times 3.5)) / 0.77 = 4 \text{ kg CO}_2\text{-e/kg}$$

This value was also applied to turkey, for which no data existed, and to game birds such as pheasant and quail.

## Duck

The same edible proportion was assumed as for chicken (0.77 kg/kg hung carcass).

Therefore, the GHG emissions per kg edible portion was calculated as 5.32 kg CO<sub>2</sub>-e/kg from the DEFRA<sup>i</sup> figure for hung carcass:  $4.1 / 0.77 = 5.32 \text{ kg CO}_2\text{-e/kg}$ . This figure was also applied to goose.

## Egg

The DEFRA<sup>i</sup> value for a dozen eggs was 1.8 kg CO<sub>2</sub>-e. The shell-free weight of 1 average egg is 50 g, therefore 12 eggs weigh 0.6 kg, and the value for 1 kg egg was calculated as 3.0 kg CO<sub>2</sub>-e/kg.

## Tomato

The following values for tomatoes were given by DEFRA:<sup>i</sup>

|                 |                               |
|-----------------|-------------------------------|
| Oil heated UK   | 2.3 kg CO <sub>2</sub> -e/kg  |
| Waste heated UK | 0.39 kg CO <sub>2</sub> -e/kg |
| Spanish         | 1.8 kg CO <sub>2</sub> -e/kg  |

The average of oil-heated UK and Spanish was calculated, then lowered slightly to represent a small proportion from waste heated production, to give a value of 2 kg CO<sub>2</sub>-e/kg.

## Mineral water and alcoholic beverages

In the absence of any data, the value for soft beverages was applied on the assumption that much of the impact would be due to bottling, packaging and transport, common to all of these.

## Miscellaneous

In the absence of any data or knowledge of food group, the average of all non-meat foods (excluding beverages) was calculated as 1.85 kg CO<sub>2</sub>-e/kg and applied to the proportion of foods classified as miscellaneous due to lack of information about the food or the GHG emissions.

---

<sup>i</sup> Department for Environment Food and Rural Affairs. Scenario building to test and inform the development of a BSI method for assessing GHG emissions from food. Research project final report FO0404. London: DEFRA; 2009.

<sup>ii</sup> House of Commons. Note SN/SC-01363. 2009.

<sup>iii</sup> EBLEX. Change in the air: The English beef and sheep production roadmap. Kenilworth: EBLEX; 2009.

<sup>iv</sup> Spedding A. RuSource Briefing 814: Feeding Britain - beef and sheep meat. London: Arthur Rank Centre; 2009.

<sup>v</sup> Red Meat Industry Forum. Introduction to beef production in UK. RMIF; 2007.

<sup>vi</sup> Cederberg C, Meyer D, Flysjo A. Life cycle inventory of greenhouse gas emissions and use of land and energy in Brazilian beef production. Sweden: SIK; 2009.

<sup>vii</sup> Spedding A. RuSource Briefing 815: Feeding Britain - pig meat. London; 2009.

<sup>viii</sup> Spedding A. RuSource Briefing 650: Poultry production. London: Arthur Rank Centre; 2008.

**Figure 1:** Reported and estimated habitual intakes of red plus processed meat across strata based on energy-adjusted red and processed meat intake (mean and 95% confidence interval). Intakes in mean g/d following energy-adjustment and standardisation to sex-specific mean total reported energy intake. Overall factual and counterfactual (CF) mean intakes are also shown.

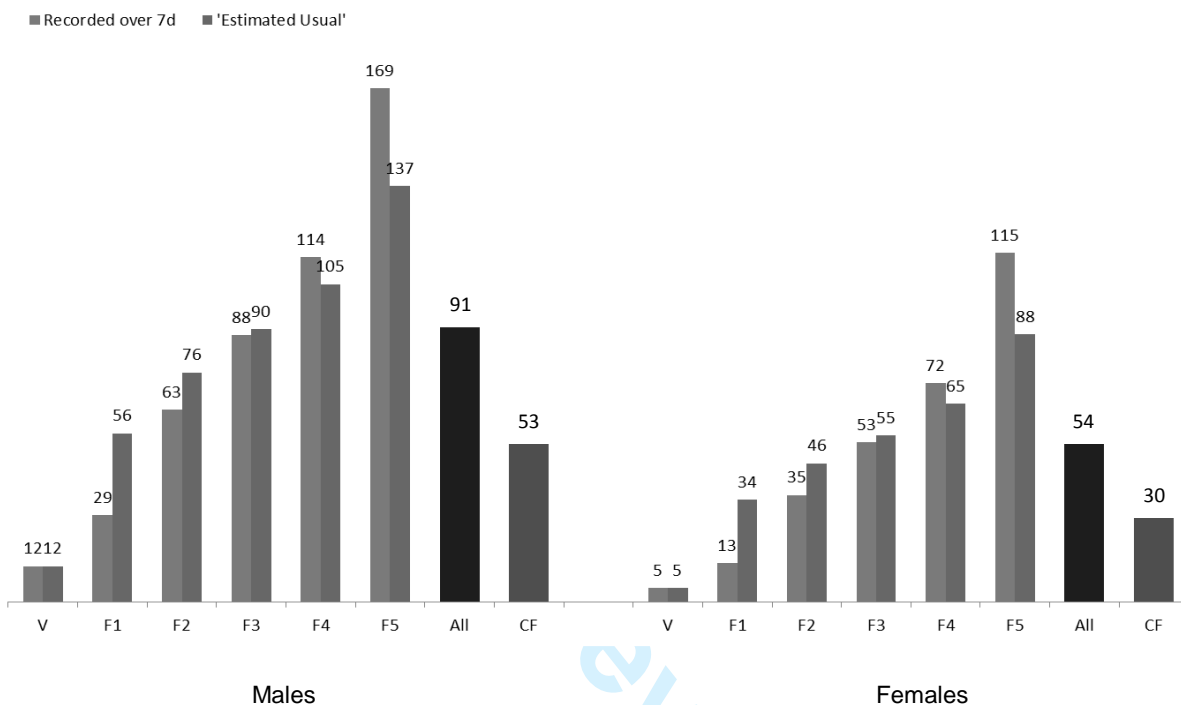

V=Vegetarian; F1-5= Fifths of energy-adjusted red + processed meat intake (F1=lowest intake); CF=counterfactual

1  
2  
3  
4  
5  
6  
7  
8  
9  
10  
11  
12  
13  
14  
15  
16  
17  
18  
19  
20  
21  
22  
23  
24  
25  
26  
27  
28  
29  
30  
31  
32  
33  
34  
35  
36  
37  
38  
39  
40  
41  
42  
43  
44  
45  
46  
47  
48  
49  
50  
51  
52  
53  
54  
55  
56  
57  
58  
59  
60

For peer review only

**Figure 2:** Diet-related standardised energy-adjusted CO<sub>2</sub>-e emissions according to dietary component across sex-specific categories of energy-adjusted red plus processed meat intake (based on estimated habitual intake of red and processed meats)

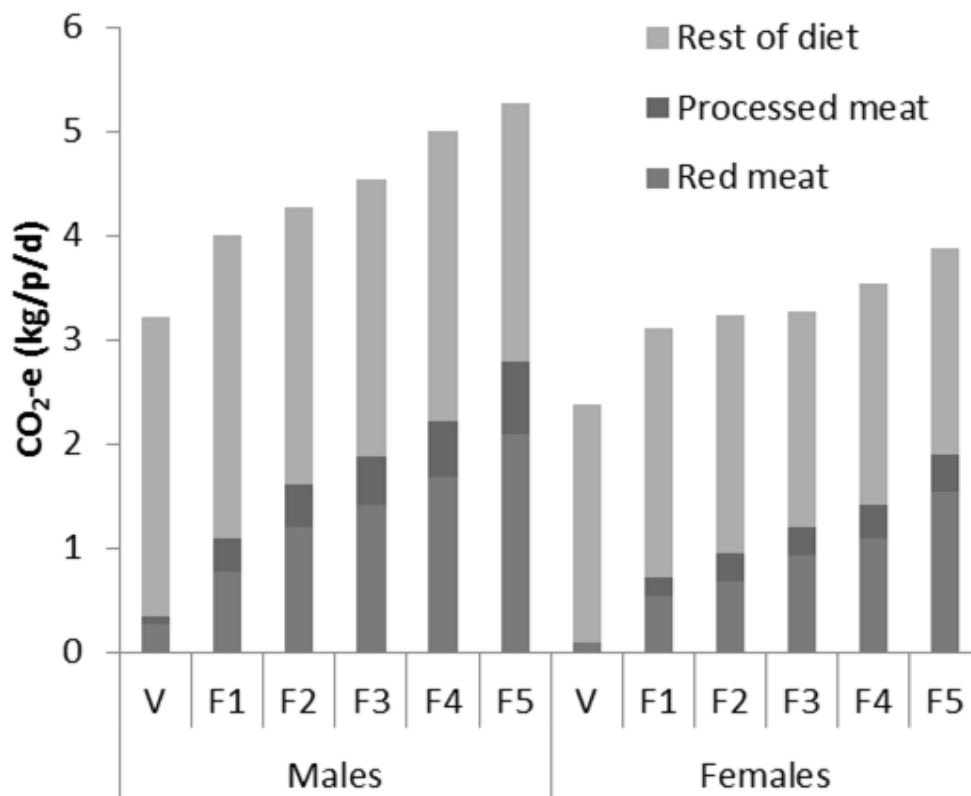

V=Vegetarian; F1-5=Fifths of energy-adjusted red plus processed meat intake (F1=lowest intake)

View only
